# Supplementary material
Source: PubMed Central journal article supplement (PMC3494398)
Supplement: cr2012140x1.pdf [file cr2012140x1.pdf]

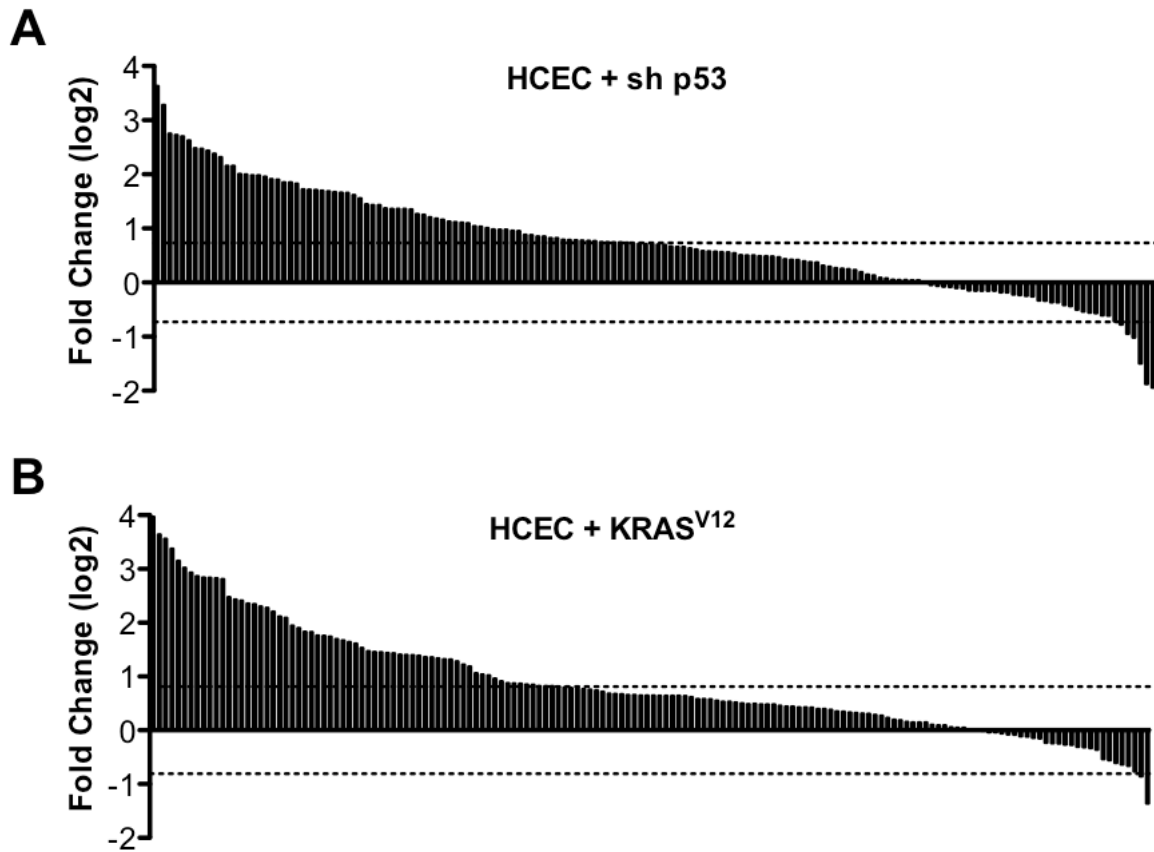

**Supplementary information, Figure S1** Overall distribution of all pooled siRNAs screened in **(A)** 1CTP and **(B)** 1CTR human colonic epithelial cells (HCECs) for changes in cell invasion. Dotted line represents the cutoff point of three standard deviations.
