# Supplementary material
Source: PubMed Central journal article supplement (PMC3494398)
Supplement: cr2012140x2.pdf [file cr2012140x2.pdf]

**A**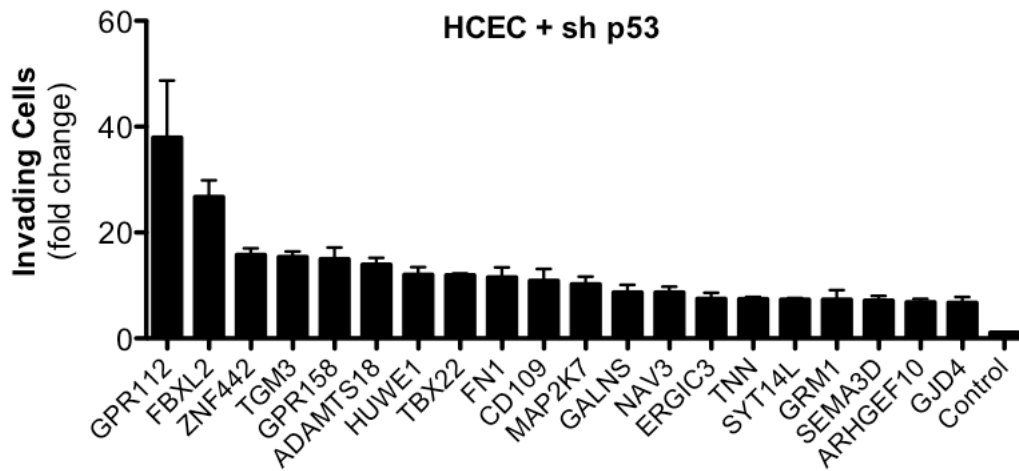**B**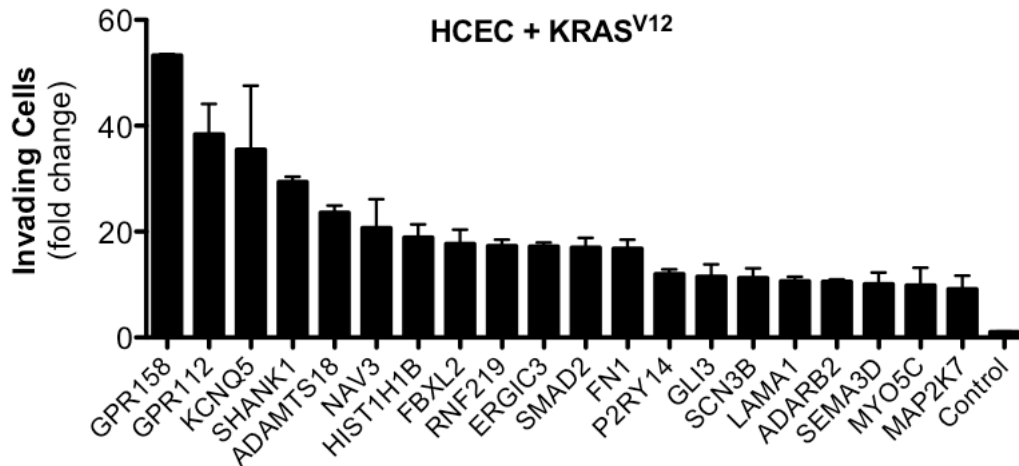

**Supplementary information, Figure S2** The top twenty most potent enhancers of invasion in (A) 1CTP and (B) 1CTR HCECs upon depletion by pooled siRNAs.
