# Supplementary material
Source: PubMed Central journal article supplement (PMC3494398)
Supplement: cr2012140x3.pdf [file cr2012140x3.pdf]

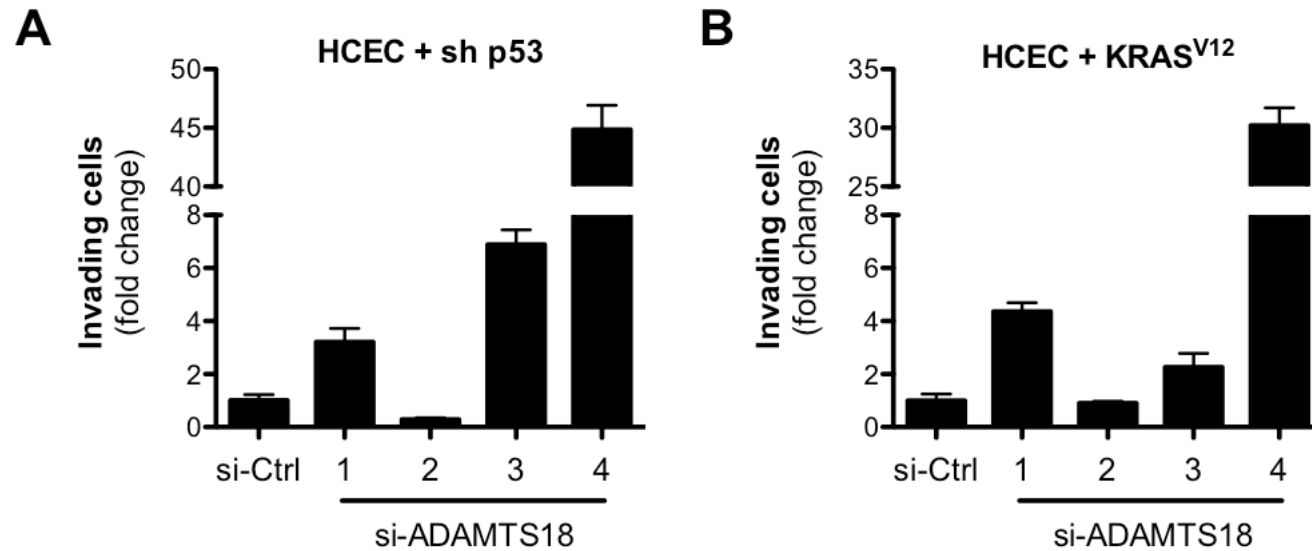

**Supplementary information, Figure S3** Deconvolution of pooled ADAMTS18 siRNAs in **(A)** 1CTP and **(B)** 1CTR HCECs for enhancements in cell invasion. Cells were transfected with individual siRNAs and tested for invasion as previously described.
