# Supplementary material
Source: PubMed Central journal article supplement (PMC3494398)
Supplement: cr2012140x4.pdf [file cr2012140x4.pdf]

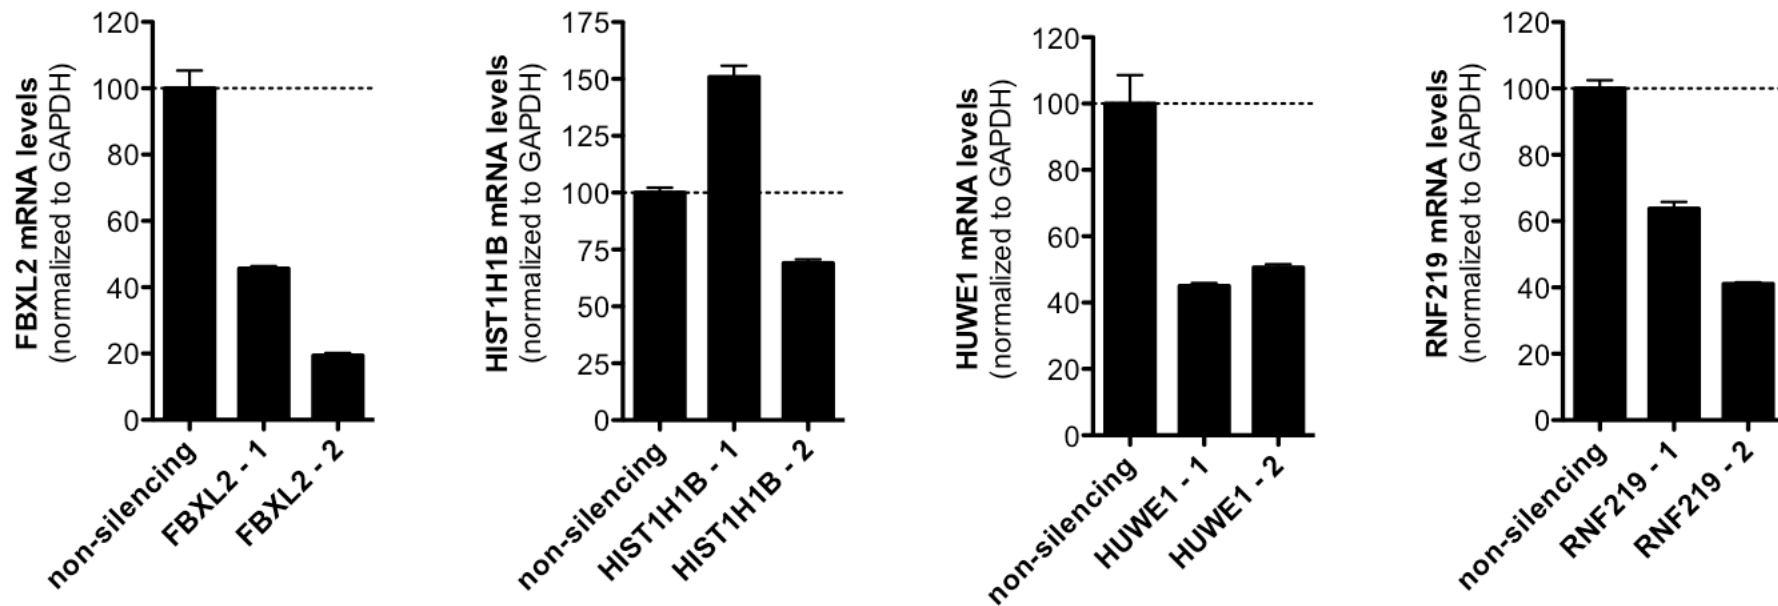

**Supplementary information, Figure S4** shRNA knockdown efficiency as assessed by quantitative real-time PCR. Total RNA isolated from the indicated cell lines infected with lentiviral shRNAs (Open Biosystems, pGIPZ library) were reverse transcribed and subjected to quantitative real-time PCR. GAPDH was used as an internal control and data are normalized to a non-silencing shRNA. Seven out of eight shRNAs tested displays marked reduction in target mRNA levels.
