# Supplementary material
Source: PubMed Central journal article supplement (PMC3494398)
Supplement: cr2012140x5.pdf [file cr2012140x5.pdf]

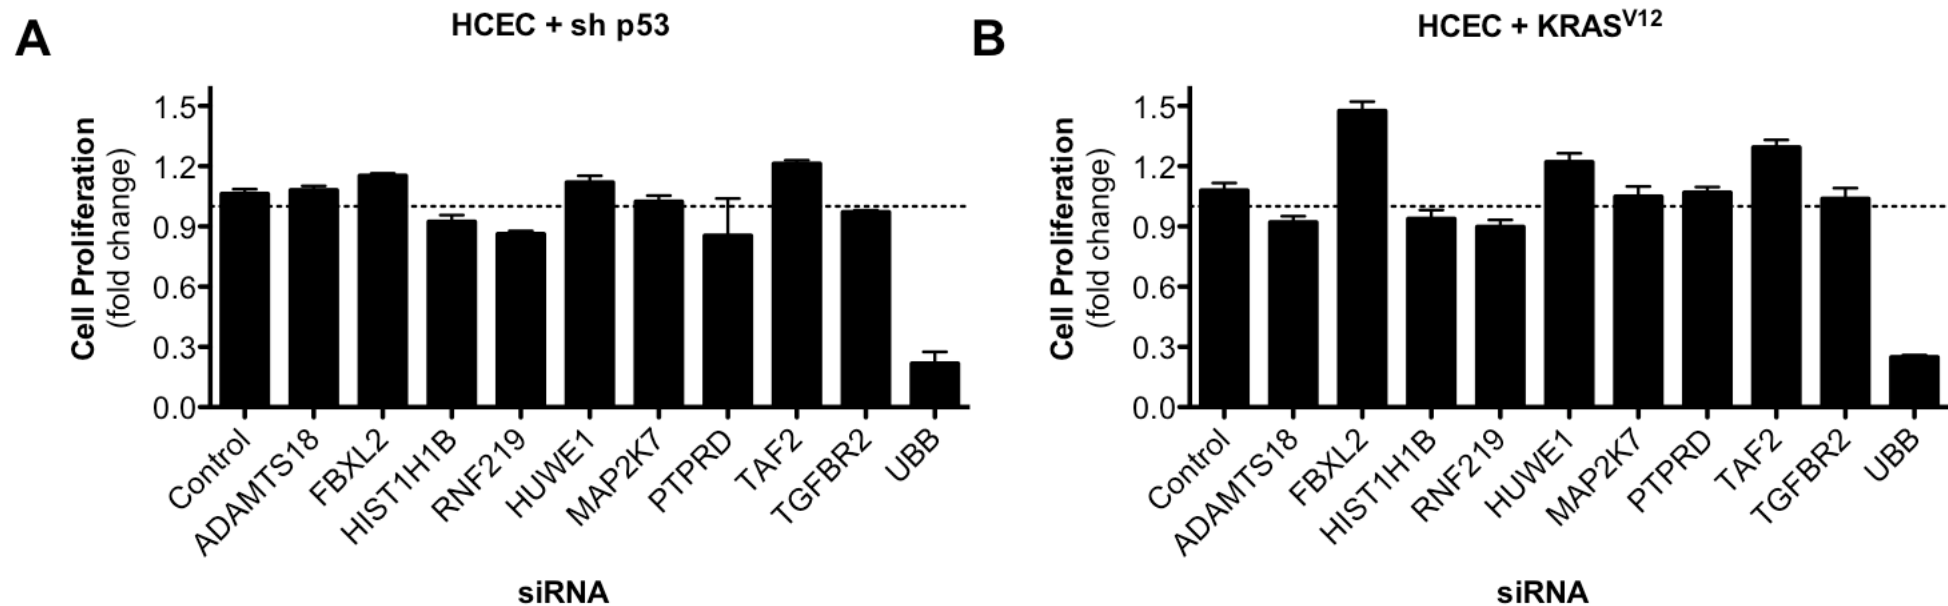

**Supplementary information, Figure S5** Transfection of pooled siRNAs targeting the context-independent multifunctional tumor suppressors do not drastically change proliferation of **(A)** 1CTP and **(B)** 1CTR HCECs after 96hr transfection.
