# Supplementary material
Source: PubMed Central journal article supplement (PMC3494398)
Supplement: cr2012140x6.pdf [file cr2012140x6.pdf]

|             |             |           |        |              |           |                       |
|-------------|-------------|-----------|--------|--------------|-----------|-----------------------|
| D-021769-21 | D-021769-21 | ATP11A    | 23250  | NM_032189    | 150421680 | GAGCCAGAGUGGAGCGUAA   |
| D-007268-01 | D-007268-01 | BCL9      | 607    | NM_004326    | 72256199  | CUACUGAGAUGGCCAAUAA   |
| D-013017-02 | D-013017-02 | C10ORF137 | 26098  | NM_015608    | 31742483  | GAAGGACUCUCUUACUAGA   |
| D-005766-03 | D-005766-03 | ADAMTS15  | 170689 | NM_139055    | 21265057  | CUGCGAGCGUCUUCUUAUU   |
| D-005769-03 | D-005769-03 | ADAMTS18  | 170692 | NM_199355    | 149158721 | GCCAGUAUCUCAAGAAUUU   |
| D-005772-02 | D-005772-02 | ADAMTS20  | 80070  | NM_025003    | 124430556 | GCAAAACACUGUGGAUUUA   |
| D-010232-02 | D-010232-02 | AKAP12    | 9590   | NM_005100    | 21493021  | GACACAAGCUCACCGUGAUA  |
| D-020426-17 | D-020426-17 | ATP13A    | 57130  | NM_020410    | 9966896   | UCAAGAGCCUGGCGCUCAA   |
| D-032653-02 | D-032653-02 | ATP13A5   | 344905 | NM_198505    | 66730420  | GAAUUUACCAGUAUCUCAU   |
| D-021248-02 | D-021248-02 | C15ORF2   | 23742  | NM_018958    | 112421133 | GCAUUGGGCACACCGUUAU   |
| D-010720-02 | D-010720-02 | CD164L1   | 57124  | NM_020404    | 9966884   | GCAGCCAACUAUCCAGAU    |
| D-004570-02 | D-004570-02 | MCP       | 4179   | NM_002389    | 27502401  | AGAGAAACAUUGCCAUUAU   |
| D-012279-02 | D-012279-02 | CHL1      | 10752  | NM_006614    | 27894375  | GAAGUAUACAGGAGUAAAU   |
| D-019199-02 | D-019199-02 | CNTN4     | 152330 | NM_175607    | 28373121  | CCGAAACAUCAUUGGAA     |
| D-011012-02 | D-011012-02 | COL3A1    | 1281   | NM_000090    | 110224482 | CAUUAUGAUGUCAAGUCUGG  |
| D-007884-02 | D-007884-02 | DSCAM1    | 57453  | NM_020693    | 21359934  | GCAGAAUUGUUAUAGCA     |
| D-021367-04 | D-021367-04 | DTNB      | 1838   | NM_033148    | 37577100  | GCACAGGCUUGCCCAUGUU   |
| D-004888-04 | D-004888-04 | ERCC6     | 2074   | NM_000124    | 4557564   | GAAGAGCCUUGCGUUC      |
| D-011032-02 | D-011032-02 | F8        | 2157   | NM_000132    | 10518504  | GCACCCAACUUAUUAUGC    |
| D-022697-02 | D-022697-02 | FLJ13305  | 84140  | NM_032180    | 83523747  | GGAGUUACCCAAACCUAGAA  |
| D-004264-04 | D-004264-04 | FBXW7     | 55294  | NM_001013415 | 61743925  | GAACUCAAAUCUCCUAAAGG  |
| D-008341-02 | D-008341-02 | GALNS     | 2588   | NM_000512    | 61698137  | CAACGGCGUCGCCUUAUU    |
| D-010825-02 | D-010825-02 | GNAS      | 2778   | NM_001077488 | 117938761 | GAGAUGAGUUUCUGAGGAU   |
| D-005616-02 | D-005616-02 | GRM1      | 2911   | NM_000838    | 6006005   | GAUUAUUUGUGCAAGAU     |
| D-006730-02 | D-006730-02 | GUCY1A2   | 2977   | NM_000855    | 4504210   | GACAGUGGAUCUUCUUAUU   |
| D-019514-02 | D-019514-02 | HAPLN1    | 1404   | NM_001884    | 40254458  | GAUUAUUUGCUGCCUGGAA   |
| D-012049-02 | D-012049-02 | HIST1H1B  | 3009   | NM_005322    | 15718716  | GGAGCGCAAUUGCCUUUCU   |
| D-018298-03 | D-018298-03 | FLJ37794  | 283284 | NM_173588    | 148232257 | GGUCUGAGCGCACACGCUUA  |
| D-011480-02 | D-011480-02 | IRS4      | 8471   | NM_003604    | 4504732   | UGAAACAGGUCGAUUCUUAU  |
| D-008006-02 | D-008006-02 | ITGAE     | 3682   | NM_002208    | 148728187 | CAACAAAUCUCUUAUAGAG   |
| D-017253-02 | D-017253-02 | SMARCA2   | 6595   | NM_003070    | 48255899  | CCGCAUAGCUCUAUAGGAUA  |
| D-006275-02 | D-006275-02 | KCNQ5     | 56479  | NM_019842    | 28373064  | GACAUGUUGUGUAGAAUUA   |
| D-022627-02 | D-022627-02 | KIAA0182  | 23199  | NM_014615    | 44955925  | GAACUGGACCACUUAACGAA  |
| D-003984-02 | D-003984-02 | KIAA0556  | 23247  | NM_015202    | 54792777  | GAAGAAGCCUGGAACUUAAG  |
| D-024823-02 | D-024823-02 | KIAA2022  | 340533 | NM_001008537 | 56711285  | AAUCCAUCUGUCUCAUAUA   |
| D-018002-02 | D-018002-02 | K6IRS3    | 319101 | NM_175068    | 31341282  | GAUAUUAACCAUCUCCUGA   |
| D-019252-02 | D-019252-02 | LMO7      | 4008   | NM_005358    | 111119012 | GAAGUAUUAUUGGAGAUUU   |
| D-010348-04 | D-010348-04 | MAP1B     | 4131   | NM_005909    | 153945727 | GAACAGUCCUCAAUUGUCUA  |
| D-007299-03 | D-007299-03 | MAP2      | 4133   | NM_031845    | 87578391  | GAAGAAGGUUCCGCAUUAU   |
| D-004016-04 | D-004016-04 | MAP2K7    | 5609   | NM_145185    | 21735543  | GACCUCAAACUUGGAUUAUCA |
| D-012462-04 | D-012462-04 | MAPK8IP2  | 23542  | NM_016431    | 117446084 | CGCAACAGCUCUUAUUUCG   |
| D-007039-02 | D-007039-02 | MLL3      | 58508  | NM_170606    | 91718901  | GAACAAGGAUUCCGAGAA    |
| D-017137-22 | D-017137-22 | MYOHD1    | 80179  | NM_001033580 | 75812979  | CGCCCGAGCUAAUAGAGAGA  |
| D-018348-02 | D-018348-02 | NAV3      | 89795  | NM_014903    | 120953250 | GAAAGAGCUUAGGGAAUAU   |
| D-003916-02 | D-003916-02 | NF1       | 4763   | NM_000267    | 109826365 | GAUAGAAGCUACAGUAAUA   |
| D-006490-02 | D-006490-02 | NOS3      | 4846   | NM_000603    | 40254421  | CGGAACAGCACAAGAGUUA   |
| D-020443-02 | D-020443-02 | NTNG1     | 22854  | NM_014917    | 54312077  | ACACUUGGCACGCUACUUU   |
| D-027177-03 | D-027177-03 | OBSCN     | 84033  | NM_052843    | 58331252  | CAGGAGAGUCCAAUUUGU    |
| D-019291-02 | D-019291-02 | PHIP      | 55023  | NM_017934    | 38679895  | CGCAUAGCAAUACAGUUA    |
| D-020688-03 | D-020688-03 | PRDM9     | 56979  | NM_020227    | 147905619 | CCACACAGCCGUAAUGACA   |
| D-005028-02 | D-005028-02 | PRKCM     | 5587   | NM_002742    | 115529462 | GAAGAGGUUUUGUUAUUA    |
| D-003023-06 | D-003023-06 | PTEN      | 5728   | NM_000314    | 110224474 | GAUCAGCAUACACAUAUUA   |
| D-008527-02 | D-008527-02 | PTPRD     | 5789   | NM_130393    | 104486447 | GAAGAAAUCUCGCGGGAAA   |
| D-016380-02 | D-016380-02 | C13ORF7   | 79596  | NM_024546    | 88759347  | GAUUUGGAGUUUGGUUAUCA  |
| D-016067-03 | D-016067-03 | SFRS6     | 6431   | NM_006275    | 38158029  | GCGACAAGCAGGUGAAGUA   |
| D-016937-02 | D-016937-02 | SH3TC1    | 54436  | NM_018986    | 145386550 | CAGGGAAGAUUAUUAUCAU   |
| D-003709-02 | D-003709-02 | SLC29A1   | 2030   | NM_001078176 | 118582264 | GCCAUGAUCUGCGCUAUUG   |
| D-003561-02 | D-003561-02 | SMAD2     | 4087   | NM_005901    | 118572580 | GCAGAAACUAUCCUACUAU   |
| D-014039-02 | D-014039-02 | SYNE1     | 23345  | NM_133650    | 154277119 | GCAAAGCCUUGGAUGAUAG   |
| D-009341-02 | D-009341-02 | TAF2      | 6873   | NM_003184    | 115527086 | GAAACACGUUAUGAGUUA    |
| D-017916-02 | D-017916-02 | TCERG1L   | 256536 | NM_174937    | 148727263 | GUAAAUUGCUGCUAGCCAA   |
| D-003816-02 | D-003816-02 | TCF7L2    | 6934   | NM_030756    | 141801196 | CCUCAGCGCUCCUUAAGAAA  |
| D-003930-02 | D-003930-02 | TGFBR2    | 7048   | NM_003242    | 133908633 | GAACAUACACUAGAGACA    |
| D-003932-02 | D-003932-02 | TIAM1     | 7074   | NM_003253    | 115583669 | GAAGGAGUCCAGCUUUUU    |
| D-003329-07 | D-003329-07 | TP53      | 7157   | NM_000546    | 120407067 | GCACAGAGGAAGAAUUCU    |
| D-007117-02 | D-007117-02 | UHRF2     | 115426 | NM_152896    | 23312363  | CCAAGAGAACACAUAUUA    |
| D-008334-04 | D-008334-04 | UQCRC2    | 7385   | NM_003366    | 50592987  | GGCUAAUUGCUGAUUAUCAU  |
| D-019932-02 | D-019932-02 | ZNF262    | 9202   | NM_005095    | 44890067  | GAAGAAGUUAUAGUGGCU    |
| D-013382-02 | D-013382-02 | UBB       | 7314   | NM_018955    | 22538474  | GUUAGCAGAUUCUGUGAA    |
| D-004128-02 | D-004128-02 | ABCA1     | 19     | NM_005502    | 21536375  | GAACCUACUUAUCAGAGA    |
| D-007301-02 | D-007301-02 | ABCB11    | 8647   | NM_003742    | 21536377  | AAAGAGAGUUUUAAGGUA    |
| D-011203-04 | D-011203-04 | AGC1      | 176    | NM_001135    | 126090882 | GCACUGAGUUCUUGGAUU    |
| D-006327-02 | D-006327-02 | ACSL5     | 51703  | NM_016234    | 12669912  | GAAGAACAUGACCUAACA    |
| D-008808-02 | D-008808-02 | ADAM29    | 11086  | NM_014269    | 73765551  | GAUUUAACAUUGCCGAUUGG  |
| D-022416-02 | D-022416-02 | ADAMTSL3  | 57188  | NM_207517    | 145275197 | GAACAUAAUCCUUGGACUG   |
| D-020743-02 | D-020743-02 | ADARB2    | 105    | NM_018702    | 161377416 | CGCGGAGUUGGAGAUUAU    |
| D-008497-04 | D-008497-04 | AKAP6     | 9472   | NM_004274    | 21493044  | AGACGGAGCUGCUUAUUA    |
| D-003103-06 | D-003103-06 | ALK       | 238    | NM_004304    | 29029631  | GGAAGAGUCUGGCAGUUA    |

|             |             |           |        |              |           |                      |
|-------------|-------------|-----------|--------|--------------|-----------|----------------------|
| D-003869-06 | D-003869-06 | APC       | 324    | NM_000038    | 53759121  | GAGAAUACGUCCACACUU   |
| D-013460-03 | D-013460-03 | ARHGEF10  | 9639   | NM_014629    | 62548863  | GACGAUGGAAUACAUUA    |
| D-021769-22 | D-021769-22 | ATP11A    | 23250  | NM_032189    | 150421680 | CGGCAAGCUCGUUCGGAAA  |
| D-007268-02 | D-007268-02 | BCL9      | 607    | NM_004326    | 72256199  | GCCAGACGUCGAAUUAUU   |
| D-013017-03 | D-013017-03 | C10ORF137 | 26098  | NM_015608    | 31742483  | GAGCACGAUUCGACGUUA   |
| D-005766-04 | D-005766-04 | ADAMTS15  | 170689 | NM_139055    | 21265057  | CCAAGCGUUUCUGUCUAU   |
| D-005769-04 | D-005769-04 | ADAMTS18  | 170692 | NM_199355    | 149158721 | GGGCACAACUUUGGUAUGA  |
| D-005772-03 | D-005772-03 | ADAMTS20  | 80070  | NM_025003    | 124430556 | GAAAGGAUGGUGACUAUA   |
| D-010232-03 | D-010232-03 | AKAP12    | 9590   | NM_005100    | 21493021  | CGACAGAAGUGUUUGAUGA  |
| D-020426-18 | D-020426-18 | ATP13A    | 57130  | NM_020410    | 9966896   | GCCUCAAGUUCGUCGGCUU  |
| D-032653-03 | D-032653-03 | ATP13A5   | 344905 | NM_198505    | 66730420  | CAACAUGUGUGGCAAAUA   |
| D-021248-03 | D-021248-03 | C15ORF2   | 23742  | NM_018958    | 112421133 | GGUGAUCAGUCUUAUGAGA  |
| D-010720-03 | D-010720-03 | CD164L1   | 57124  | NM_020404    | 9966884   | GGACCUCGAGAUAGAGUUG  |
| D-004570-03 | D-004570-03 | MCP       | 4179   | NM_002389    | 27502401  | GGACUUACGAGUUUGGUUA  |
| D-012279-03 | D-012279-03 | CHL1      | 10752  | NM_006614    | 27894375  | GCGAGUAUUAUUGUAUUU   |
| D-019199-03 | D-019199-03 | CNTN4     | 152330 | NM_175607    | 28373121  | ACUJAGCUGUCAAGGCAUA  |
| D-011012-03 | D-011012-03 | COL3A1    | 1281   | NM_000090    | 110224482 | GAUGGUGUUUUUCAGUUUA  |
| D-007884-03 | D-007884-03 | DSCAML1   | 57453  | NM_020693    | 21359934  | CAUCAAGCUGUCCUUUCA   |
| D-021367-05 | D-021367-05 | DTNB      | 1838   | NM_033148    | 37577100  | AAGCUGAGCCAUCAAUAU   |
| D-004888-05 | D-004888-05 | ERCC6     | 2074   | NM_000124    | 4557564   | CGACAGAAGUAUAAUAAAG  |
| D-011032-03 | D-011032-03 | F8        | 2157   | NM_000132    | 10518504  | UUAAUAGUUGCAGCAUCC   |
| D-022697-04 | D-022697-04 | FLJ13305  | 84140  | NM_032180    | 83523747  | GAUGAGAGAAUCCACACGA  |
| D-004264-05 | D-004264-05 | FBXW7     | 55294  | NM_001013415 | 61743925  | CAACAACGACGCCGAAUUA  |
| D-008341-03 | D-008341-03 | GALNS     | 2588   | NM_000512    | 61698137  | GGAGAUUGUUGGCGAGAUU  |
| D-010825-03 | D-010825-03 | GNAS      | 2778   | NM_001077488 | 117938761 | GAACGUGCCUGACUUUGAC  |
| D-005616-04 | D-005616-04 | GRM1      | 2911   | NM_000838    | 6006005   | CAACUAACCCUGGUGGUA   |
| D-006730-03 | D-006730-03 | GUCY1A2   | 2977   | NM_000855    | 4504210   | CCAGAAUUUGAUGAUGU    |
| D-019514-03 | D-019514-03 | HAPLN1    | 1404   | NM_001884    | 40254458  | ACACAGAGGUGGCAUUGU   |
| D-012049-03 | D-012049-03 | HIST1H1B  | 3009   | NM_005322    | 15718716  | GCUAAGAAGAAAGGCAACUA |
| D-018298-04 | D-018298-04 | FLJ37794  | 283284 | NM_173588    | 148232257 | GCAAGUACGAUGUGAAGCA  |
| D-011480-03 | D-011480-03 | IRS4      | 8471   | NM_003604    | 4504732   | GAGCCACCCUUUCUAAAAG  |
| D-008006-03 | D-008006-03 | ITGAE     | 3682   | NM_002208    | 148728187 | GAGAAUCCUUUCCAAACA   |
| D-017253-03 | D-017253-03 | SMARCA2   | 6595   | NM_003070    | 48255899  | GAAGGGCACUGGUAUGCGA  |
| D-006275-03 | D-006275-03 | KCNQ5     | 56479  | NM_019842    | 28373064  | CAACACAGGUGCCAAUUAAG |
| D-022627-03 | D-022627-03 | KIAA0182  | 23199  | NM_014615    | 44955925  | CCAUAUGAGGAGGAGAGUG  |
| D-003984-03 | D-003984-03 | KIAA0556  | 23247  | NM_015202    | 54792777  | GCAGAGGAAACCGGAUUAU  |
| D-024823-03 | D-024823-03 | KIAA2022  | 340533 | NM_001008537 | 56711285  | CAAGAAUAGGCUAUUGUUG  |
| D-018002-03 | D-018002-03 | K6IRS3    | 319101 | NM_175068    | 31341282  | GCGAAGUUGGUGGAGGACUA |
| D-019252-03 | D-019252-03 | LMO7      | 4008   | NM_005358    | 111119012 | UAGCAGAAUUGGAUAAUUA  |
| D-010348-05 | D-010348-05 | MAP1B     | 4131   | NM_005909    | 153945727 | UAGGUAACCUUGAUGAUGUA |
| D-007299-04 | D-007299-04 | MAP2      | 4133   | NM_031845    | 87578391  | GACCUCAGCUGACAGAGAA  |
| D-004016-05 | D-004016-05 | MAP2K7    | 5609   | NM_145185    | 21735543  | GGCGAGGAGUUCGACCUCAA |
| D-012462-20 | D-012462-20 | MAPK8IP2  | 23542  | NM_016431    | 117446084 | UGUACGACGCGGCUAAGUA  |
| D-007039-03 | D-007039-03 | MLL3      | 58508  | NM_170606    | 91718901  | GCAAUUGUCUUUCUGGAUA  |
| D-017137-23 | D-017137-23 | MYOHD1    | 80179  | NM_001033580 | 75812979  | GGGAGGUCCUGCUGUAACA  |
| D-018348-03 | D-018348-03 | NAV3      | 89795  | NM_014903    | 120953250 | GAAAGGACAUUCGCAUAUA  |
| D-003916-04 | D-003916-04 | NF1       | 4763   | NM_000267    | 109826365 | CAACAAGCJUAUUCUUUA   |
| D-006490-03 | D-006490-03 | NOS3      | 4846   | NM_000603    | 40254421  | CGAGGAGACUUCGAAUUCU  |
| D-020443-03 | D-020443-03 | NTNG1     | 22854  | NM_014917    | 54312077  | UGAGCUAACAGACAACAUA  |
| D-027177-05 | D-027177-05 | OBSCN     | 84033  | NM_052843    | 58331252  | GCAGACAGCGACACCUUA   |
| D-019291-03 | D-019291-03 | PHIP      | 55023  | NM_017934    | 38679895  | CAACAACUUUAUCGUAACA  |
| D-020688-04 | D-020688-04 | PRDM9     | 56979  | NM_020227    | 147905619 | GGAUAAUACGGCCAGGAA   |
| D-005028-03 | D-005028-03 | PRKCM     | 5587   | NM_002742    | 115529462 | GAUUGCAGCUUUAUGUAU   |
| D-003023-07 | D-003023-07 | PTEN      | 5728   | NM_000314    | 110224474 | GGCGCUAUGUGUAUUAUUA  |
| D-008527-03 | D-008527-03 | PTPRD     | 5789   | NM_130393    | 104486447 | CCAACAAGCUCUUAUCUAUU |
| D-016380-03 | D-016380-03 | C13ORF7   | 79596  | NM_024546    | 88759347  | CCAAAGGUUCUCUAACUA   |
| D-016067-04 | D-016067-04 | SFRS6     | 6431   | NM_006275    | 38158029  | CGUACGAAUACAGGCUUA   |
| D-016937-03 | D-016937-03 | SH3TC1    | 54436  | NM_018986    | 145386550 | GAACGUGGCCUUGUACACA  |
| D-003709-03 | D-003709-03 | SLC29A1   | 2030   | NM_001078176 | 118582264 | AGAGGAUUCUGGAAUUAU   |
| D-003561-03 | D-003561-03 | SMAD2     | 4087   | NM_005901    | 118572580 | GAAGAGGAGUGCGCUUAUA  |
| D-014039-03 | D-014039-03 | SYNE1     | 23345  | NM_133650    | 154277119 | GAAGAGACGUGGCGAUGU   |
| D-009341-04 | D-009341-04 | TAF2      | 6873   | NM_003184    | 115527086 | GAGCUUGGUGUUGGUUCUA  |
| D-017916-03 | D-017916-03 | TCERG1L   | 256536 | NM_174937    | 148727263 | CAUAACAGCCUUAAGGUGA  |
| D-003816-03 | D-003816-03 | TCF7L2    | 6934   | NM_030756    | 141801196 | AAAGUGCGUUCGCUACAUA  |
| D-003930-03 | D-003930-03 | TGFBR2    | 7048   | NM_003242    | 133908633 | CAACAACGUGGACAGUCAAG |
| D-003932-04 | D-003932-04 | TIAM1     | 7074   | NM_003253    | 115583669 | GAAGUGUCUUAACCUAACG  |
| D-003329-08 | D-003329-08 | TP53      | 7157   | NM_000546    | 120407067 | GAAGAAACACUGGAUGGA   |
| D-007117-03 | D-007117-03 | UHRF2     | 115426 | NM_152896    | 23312363  | GAAAUUACCAUUAUGAAGA  |
| D-008334-05 | D-008334-05 | UQCRC2    | 7385   | NM_003366    | 50592987  | GGUGAUUGCUUCUUUGGAA  |
| D-019932-03 | D-019932-03 | ZNF262    | 9202   | NM_005095    | 44890067  | GACACCAUGUUAACACGUA  |
| D-013382-03 | D-013382-03 | UBB       | 7314   | NM_018955    | 22538474  | GACCAUCACUCUGGAGGUG  |
| D-004128-03 | D-004128-03 | ABCA1     | 19     | NM_005502    | 21536375  | CGACAAGGCCGACCAUUA   |
| D-007301-03 | D-007301-03 | ABCB11    | 8647   | NM_003742    | 21536377  | GGAAUUGCCUUCGCGAGUA  |
| D-011203-05 | D-011203-05 | AGC1      | 176    | NM_001135    | 126090882 | GAUCGUGACCCAAGUGGUU  |
| D-006327-03 | D-006327-03 | ACSL5     | 51703  | NM_016234    | 12669912  | GAUAGGAAUUGAGAGAAA   |
| D-008808-03 | D-008808-03 | ADAM29    | 11086  | NM_014269    | 73765551  | UGACAGAAUUCCAUAUAU   |
| D-022416-03 | D-022416-03 | ADAMTSL3  | 57188  | NM_207517    | 145275197 | ACAAUCCGAUGUCCUGUA   |
| D-020743-03 | D-020743-03 | ADARB2    | 105    | NM_018702    | 161377416 | GGACUCAGAGGGAUCGAUA  |

|             |             |           |        |              |           |                      |
|-------------|-------------|-----------|--------|--------------|-----------|----------------------|
| D-008497-05 | D-008497-05 | AKAP6     | 9472   | NM_004274    | 21493044  | GUAUAGGACCCUGGUUA    |
| D-003103-07 | D-003103-07 | ALK       | 238    | NM_004304    | 29029631  | GCACGUGGCUCGGGACAUU  |
| D-003869-07 | D-003869-07 | APC       | 324    | NM_000038    | 53759121  | GAACUAGAUACACCAUAA   |
| D-013460-04 | D-013460-04 | ARHGEF10  | 9639   | NM_014629    | 62548863  | GACCUAACCCGUUUAAAGG  |
| D-021769-23 | D-021769-23 | ATP11A    | 23250  | NM_032189    | 150421680 | GCAUAGGUGUCAUCGGCAA  |
| D-007268-03 | D-007268-03 | BCL9      | 607    | NM_004326    | 72256199  | GAACAUUUUUAACAACAAG  |
| D-013017-04 | D-013017-04 | C10ORF137 | 26098  | NM_015608    | 31742483  | UGAAAGCGCUAAGGUCAUU  |
| D-005766-05 | D-005766-05 | ADAMTS15  | 170689 | NM_139055    | 21265057  | GCAAGAAGGUGACUGGACU  |
| D-005769-05 | D-005769-05 | ADAMTS18  | 170692 | NM_199355    | 149158721 | GGUGUGAGACCAAGUUUUAU |
| D-005772-05 | D-005772-05 | ADAMTS20  | 80070  | NM_025003    | 124430556 | CAAGAACUGUCCCGAGUGA  |
| D-010232-04 | D-010232-04 | AKAP12    | 9590   | NM_005100    | 21493021  | AUAAAGAGAUAGGCUACUAA |
| D-020426-19 | D-020426-19 | ATP13A    | 57130  | NM_020410    | 9966896   | AGAGGGUGACUGCGAACAA  |
| D-032653-04 | D-032653-04 | ATP13A5   | 344905 | NM_198505    | 66730420  | GGAGAAAGUUAUACCGUUA  |
| D-021248-04 | D-021248-04 | C15ORF2   | 23742  | NM_018958    | 112421133 | CAGAAUUUUAUCGAGUGUA  |
| D-010720-04 | D-010720-04 | CD164L1   | 57124  | NM_020404    | 9966884   | CCACCAGCCUCUGUGAUC   |
| D-004570-04 | D-004570-04 | MCP       | 4179   | NM_002389    | 27502401  | CUAUGGAGCUCUUGGUAA   |
| D-012279-04 | D-012279-04 | CHL1      | 10752  | NM_006614    | 27894375  | CAGUGAAGAUAGGUAUUAU  |
| D-019199-04 | D-019199-04 | CNTN4     | 152330 | NM_175607    | 28373121  | AAAUUAAGCCAUUCAGCGA  |
| D-011012-04 | D-011012-04 | COL3A1    | 1281   | NM_000090    | 110224482 | CAAAGGUCCAGCUGGUAUA  |
| D-007884-04 | D-007884-04 | DSCAML1   | 57453  | NM_020693    | 21359934  | GAGAAUAGGGCCUCUUUAU  |
| D-021367-18 | D-021367-18 | DTNB      | 1838   | NM_033148    | 37577100  | CGAGGCAAGUUGACGGUAU  |
| D-004888-06 | D-004888-06 | ERCC6     | 2074   | NM_000124    | 4557564   | GAUCACAUUUAUCUCCUAC  |
| D-011032-04 | D-011032-04 | F8        | 2157   | NM_000132    | 10518504  | GAGUAAAGCAAUAUCAGAU  |
| D-022697-17 | D-022697-17 | FLJ13305  | 84140  | NM_032180    | 83523747  | GCCGUAAAGAAAGAGCGAAA |
| D-004264-06 | D-004264-06 | FBXW7     | 55294  | NM_001013415 | 61743925  | GGAGUUGUGUGCGGGAUCA  |
| D-008341-04 | D-008341-04 | GALNS     | 2588   | NM_000512    | 61698137  | GGAGAUUGAUGACAGCAUU  |
| D-010825-05 | D-010825-05 | GNAS      | 2778   | NM_001077488 | 117938761 | GCAUGCACCUUCUGCAGUA  |
| D-005616-05 | D-005616-05 | GRM1      | 2911   | NM_000838    | 6006005   | GAUUAAGGUUAUACGGAAA  |
| D-006730-04 | D-006730-04 | GUCY1A2   | 2977   | NM_000855    | 4504210   | GAACAUCAAGUUUUGGUU   |
| D-019514-04 | D-019514-04 | HAPLN1    | 1404   | NM_001884    | 40254458  | AGUCAGGAACUACGGAUUU  |
| D-012049-04 | D-012049-04 | HIST1H1B  | 3009   | NM_005322    | 15718716  | GCUGCUAAGCGCAAAGCGA  |
| D-018298-18 | D-018298-18 | FLJ37794  | 283284 | NM_173588    | 148232257 | GCUCAAGGACAGCGCGAU   |
| D-011480-04 | D-011480-04 | IRS4      | 8471   | NM_003604    | 4504732   | GCGAGCAGAUCAAGGUAC   |
| D-008006-04 | D-008006-04 | ITGAE     | 3682   | NM_002208    | 148728187 | GAAAUACGUCUCUUAACCA  |
| D-017253-04 | D-017253-04 | SMARCA2   | 6595   | NM_003070    | 48255899  | CAAAGCAACCGUGGAACUA  |
| D-006275-04 | D-006275-04 | KCNQ5     | 56479  | NM_019842    | 28373064  | GGGCAAUACAUACAGUA    |
| D-022627-04 | D-022627-04 | KIAA0182  | 23199  | NM_014615    | 44955925  | GGAGAAAGGUUGUGUGUU   |
| D-003984-04 | D-003984-04 | KIAA0556  | 23247  | NM_015202    | 54792777  | UGACAGACUUAUAGGAGAA  |
| D-024823-04 | D-024823-04 | KIAA2022  | 340533 | NM_001008537 | 56711285  | GAUGAGAUUAGCACCACUAA |
| D-018002-04 | D-018002-04 | K6IRS3    | 319101 | NM_175068    | 31341282  | GGCAGGAGGCUAUGGAUUU  |
| D-019252-04 | D-019252-04 | LMO7      | 4008   | NM_005358    | 111119012 | GGACUUAUCUUAUUAAGGC  |
| D-010348-06 | D-010348-06 | MAP1B     | 4131   | NM_005909    | 153945727 | GUACAAAGACCAAGUCUAC  |
| D-007299-17 | D-007299-17 | MAP2      | 4133   | NM_031845    | 87578391  | AGAAAGGAACUGAUCGUUU  |
| D-004016-06 | D-004016-06 | MAP2K7    | 5609   | NM_145185    | 21735543  | GCAGAUUGGAGAGCAUUGA  |
| D-012462-21 | D-012462-21 | MAPK8IP2  | 23542  | NM_016431    | 117446084 | UCAACGCGAGGAGCGGAGA  |
| D-007039-05 | D-007039-05 | MLL3      | 58508  | NM_170606    | 91718901  | CCAGGCUAAUACAGUUA    |
| D-017137-24 | D-017137-24 | MYOHD1    | 80179  | NM_001033580 | 75812979  | UAACAACAGCAGUCGCUUU  |
| D-018348-04 | D-018348-04 | NAV3      | 89795  | NM_014903    | 120953250 | GGACUUAACCUUAUUAACUA |
| D-003916-06 | D-003916-06 | NF1       | 4763   | NM_000267    | 109826365 | CACCGAGUCUUAUUAUUA   |
| D-006490-04 | D-006490-04 | NOS3      | 4846   | NM_000603    | 40254421  | AGGAGAUGGUAACUUAUUU  |
| D-020443-04 | D-020443-04 | NTNG1     | 22854  | NM_014917    | 54312077  | CAAAGACAGGUUCGCGUUU  |
| D-027177-06 | D-027177-06 | OBSCN     | 84033  | NM_052843    | 58331252  | AGACAUACCGCGAAGAUGA  |
| D-019291-04 | D-019291-04 | PHIP      | 55023  | NM_017934    | 38679895  | AUUGGAGCUCUUAUACCUAA |
| D-020688-17 | D-020688-17 | PRDM9     | 56979  | NM_020227    | 147905619 | UAAGAGUUGGAACAGCGUAA |
| D-005028-21 | D-005028-21 | PRKCM     | 5587   | NM_002742    | 115529462 | UCGAAAUACUACCGGCAAA  |
| D-003023-08 | D-003023-08 | PTEN      | 5728   | NM_000314    | 110224474 | GUUAUAGAGCGUGCAGUAA  |
| D-008527-04 | D-008527-04 | PTPRD     | 5789   | NM_130393    | 104486447 | CGUCAUAGAUGCCAUGUUA  |
| D-016380-04 | D-016380-04 | C13ORF7   | 79596  | NM_024546    | 88759347  | GUAGAAGUUAUUAUAGAUG  |
| D-016067-17 | D-016067-17 | SFRS6     | 6431   | NM_006275    | 38158029  | GGAUACAGCAGUCGGAGAA  |
| D-016937-18 | D-016937-18 | SH3TC1    | 54436  | NM_018986    | 145386550 | CCUGCAAGGUGCCGACAA   |
| D-003709-04 | D-003709-04 | SLC29A1   | 2030   | NM_001078176 | 118582264 | UCAAGAUCCGUCUUAUUA   |
| D-003561-04 | D-003561-04 | SMAD2     | 4087   | NM_005901    | 118572580 | GGUGUUCGUAAGCAUUAUA  |
| D-014039-04 | D-014039-04 | SYNE1     | 23345  | NM_133650    | 154277119 | CCAACGGCUGGUGUGAUU   |
| D-009341-05 | D-009341-05 | TAF2      | 6873   | NM_003184    | 115527086 | GAAGGGAUUUCAGGCUAU   |
| D-017916-04 | D-017916-04 | TCERG1L   | 256536 | NM_174937    | 148727263 | GGACCAGUUUAAGGAGUU   |
| D-003816-04 | D-003816-04 | TCF7L2    | 6934   | NM_030756    | 141801196 | UCACGCUUUAUCACGUA    |
| D-003930-05 | D-003930-05 | TGFBR2    | 7048   | NM_003242    | 133908633 | CGCGGAAGCUCUAGGAGUU  |
| D-003932-17 | D-003932-17 | TIAM1     | 7074   | NM_003253    | 115583669 | CAUUCUUAUUCGUGUAUA   |
| D-003329-26 | D-003329-26 | TP53      | 7157   | NM_000546    | 120407067 | GCUUCGAGAUUUCGAGAA   |
| D-007117-04 | D-007117-04 | UHRF2     | 115426 | NM_152896    | 23312363  | CUACACAGAUUAGGCUAA   |
| D-008334-06 | D-008334-06 | UQCRC2    | 7385   | NM_003366    | 50592987  | GGUGGCAAAUUAAGUGUGA  |
| D-019932-17 | D-019932-17 | ZNF262    | 9202   | NM_005095    | 44890067  | CUCCAUACCUUUGUUCGAA  |
| D-013382-17 | D-013382-17 | UBB       | 7314   | NM_018955    | 22538474  | CCCAGUGACACCAUCGGAAA |
| D-004128-18 | D-004128-18 | UBCA1     | 19     | NM_005502    | 21536375  | GAAGAGUGAGGCGGGGAAA  |
| D-007301-04 | D-007301-04 | ABCB11    | 8647   | NM_003742    | 21536377  | GAAAGGUGAUGGCGUUAGA  |
| D-011203-18 | D-011203-18 | AGC1      | 176    | NM_001135    | 126090882 | ACGUUAUGGCAUCCGAGACA |
| D-006327-04 | D-006327-04 | ACSL5     | 51703  | NM_016234    | 12669912  | GUACAAACGUGUUCAAAGG  |
| D-008808-04 | D-008808-04 | ADAM29    | 11086  | NM_014269    | 73765551  | GGAAAUUCUGGACCCUGUA  |

|             |             |           |        |              |           |                      |
|-------------|-------------|-----------|--------|--------------|-----------|----------------------|
| D-022416-04 | D-022416-04 | ADAMTSL3  | 57188  | NM_207517    | 145275197 | GUAGAGGAAUCCAUGCAUG  |
| D-020743-04 | D-020743-04 | ADARB2    | 105    | NM_018702    | 161377416 | CAAGCGGAAAGAUAAAGUA  |
| D-008497-18 | D-008497-18 | AKAP6     | 9472   | NM_004274    | 21493044  | UAUCCGAAAGUUGUUGUUA  |
| D-003103-09 | D-003103-09 | ALK       | 238    | NM_004304    | 29029631  | GGUCAUAGCUCCUUGGAAU  |
| D-003869-08 | D-003869-08 | APC       | 324    | NM_000038    | 53759121  | CCAAUUUAGUGAACGUA    |
| D-013460-17 | D-013460-17 | ARHGEF10  | 9639   | NM_014629    | 62548863  | CGUGUUGCUAACCGGAAA   |
| D-021769-24 | D-021769-24 | ATP11A    | 23250  | NM_032189    | 150421680 | GGAGCAGAUUCUUGAUU    |
| D-007268-04 | D-007268-04 | BCL9      | 607    | NM_004326    | 72256199  | CAACUCAACUCCCAACAAU  |
| D-013017-17 | D-013017-17 | C10ORF137 | 26098  | NM_015608    | 31742483  | ACGGAAAGAGCAUACGAU   |
| D-021159-01 | D-021159-01 | C14ORF115 | 55237  | NM_018228    | 153791243 | UCUCAUAGGUGCUUCCUUG  |
| D-021246-01 | D-021246-01 | CACNA2D3  | 55799  | NM_018398    | 54112396  | GAUUUACCCUUUAUGACUA  |
| D-015378-01 | D-015378-01 | CD109     | 135228 | NM_133493    | 115529483 | GAAGGUAACUCUGUGUGAU  |
| D-007815-02 | D-007815-02 | C1QR1     | 22918  | NM_012072    | 88758612  | GACCUUCGUGUCAUCUGA   |
| D-013883-01 | D-013883-01 | CLSTN2    | 64084  | NM_022131    | 11545860  | CCAAGAACCUGACCGCAU   |
| D-013870-02 | D-013870-02 | CPAMD8    | 27151  | NM_015692    | 118600976 | CAACAUAGUGACCCAUUCU  |
| D-007869-01 | D-007869-01 | CSMD3     | 114788 | NM_052900    | 38045885  | GGAAUUGGUGUUAACUUUA  |
| D-011635-02 | D-011635-02 | CUTL1     | 1523   | NM_181500    | 31652237  | GCAUAAGUUCAGAGCCUA   |
| D-008971-02 | D-008971-02 | DPP10     | 57628  | NM_001004360 | 85787626  | GGAGAUUACGCAAGAUUA   |
| D-003117-05 | D-003117-05 | EPHA3     | 2042   | NM_182644    | 156547125 | GAUCGGACCUCCAGAAUA   |
| D-003125-05 | D-003125-05 | EPHB6     | 2051   | NM_004445    | 56119211  | GGAAUGCGAUCCUGCUUUA  |
| D-020898-01 | D-020898-01 | SDBCAG84  | 51614  | NM_015966    | 38327613  | UGUCCGAGCUGCAGUAUA   |
| D-025827-01 | D-025827-01 | LOC157697 | 157697 | NM_207332    | 46409303  | CGAGGAAGAUACAAUUA    |
| D-020877-01 | D-020877-01 | EVL       | 51466  | NM_016337    | 50726984  | CAUCAUGAAUCCCAAGAA   |
| D-013068-02 | D-013068-02 | SEC8L1    | 60412  | NM_001037126 | 82546831  | GAUUUGAGCAUAAAGCAUG  |
| D-011853-01 | D-011853-01 | EYA4      | 2070   | NM_172103    | 98991762  | GGUCUUUAUGCACAGAAGUA |
| D-015342-01 | D-015342-01 | FLJ10404  | 54540  | NM_019057    | 154426271 | GCAAAUCGUGUUCUGGAA   |
| D-011656-01 | D-011656-01 | FBN2      | 2201   | NM_001999    | 66346694  | GGACGUGUGUGUUGUUA    |
| D-011272-01 | D-011272-01 | FLNC      | 2318   | NM_001458    | 116805321 | GAACAAGCAUUCUCUGUA   |
| D-009853-02 | D-009853-02 | FN1       | 2335   | NM_002026    | 47132558  | GCACAACUUCGAAUUAUGA  |
| D-015828-01 | D-015828-01 | CX40.1    | 219770 | NM_153368    | 145699104 | ACACGAAGAUUCCGGAUGA  |
| D-011043-01 | D-011043-01 | GLI3      | 2737   | NM_000168    | 119393898 | GCAUAUAGAUUCCGCUUA   |
| D-005533-01 | D-005533-01 | GPR112    | 139378 | NM_153834    | 59710092  | GAACAGAUUUUAGCGCUUA  |
| D-026468-01 | D-026468-01 | GPR158    | 57512  | NM_020752    | 93204866  | GAGAUGAUUUUGCUACAGA  |
| D-007917-01 | D-007917-01 | GRID1     | 2894   | NM_017551    | 55770851  | GCUCUGGCUUUUAAUUAUG  |
| D-004777-01 | D-004777-01 | IGFBP3    | 3486   | NM_000598    | 62243067  | GCACAGAUACCCAGAACUU  |
| D-021995-01 | D-021995-01 | KIAA1409  | 57578  | NM_020818    | 150456443 | GAACAGAAGUCCAGAUAA   |
| D-005069-01 | D-005069-01 | KRAS2     | 3845   | NM_004985    | 34485723  | CGAAUUAUGAUCCAACAUA  |
| D-012118-01 | D-012118-01 | LAMA1     | 284217 | NM_005559    | 38788415  | GAUAUAGGCUCAAUUAUA   |
| D-033067-13 | D-033067-13 | LCN9      | 392399 | NM_001001676 | 48717446  | CUCUAUGAAACUUGCGAAA  |
| D-005648-01 | D-005648-01 | LGR6      | 59352  | NM_001017404 | 62912473  | GCACAGGUGUCAGAAUUG   |
| D-012673-01 | D-012673-01 | LRP2      | 4036   | NM_004525    | 126012572 | GCAGAUUGUGCCCAAUUA   |
| D-017379-01 | D-017379-01 | MCM3AP    | 8888   | NM_003906    | 33469915  | GCAAGAACUCCUGACUA    |
| D-006581-01 | D-006581-01 | MKRN3     | 7681   | NM_005664    | 74272285  | AUUUAGAGCUGGAAGAAUA  |
| D-005959-02 | D-005959-02 | MMP2      | 4313   | NM_004530    | 75905807  | UACAACAGCUGCACUGUA   |
| D-015302-01 | D-015302-01 | MYO18B    | 84700  | NM_032608    | 51317365  | CGAGGAGGCUCAAAGCAUA  |
| D-031960-01 | D-031960-01 | MYO5C     | 55930  | NM_018728    | 153945714 | GAACGGAGCUGGAUUAUUC  |
| D-017529-01 | D-017529-01 | MUP210    | 23225  | NM_024923    | 27477133  | GCAAGGUGCUUCUAGGUUA  |
| D-003978-02 | D-003978-02 | MGC24137  | 143503 | NM_152430    | 56118308  | UGUCGUCUUAUGGCUUAUC  |
| D-003728-01 | D-003728-01 | P2RX7     | 5027   | NM_002562    | 34335273  | GGAGACAUUUCGAGAAA    |
| D-005528-01 | D-005528-01 | P2RY14    | 9934   | NM_014879    | 125625351 | GAUUUAGCACAUCUUAUA   |
| D-013619-01 | D-013619-01 | PCDH11X   | 27328  | NM_014522    | 7657442   | CCAGAGACUCCGCGUUAUA  |
| D-013440-01 | D-013440-01 | PCDHA9    | 9752   | NM_014005    | 14717405  | CAUACGAGCUGCAGCCAGA  |
| D-003018-07 | D-003018-07 | PIK3CA    | 5290   | NM_006218    | 54792081  | GGACAACUGUUUCAUUAUG  |
| D-021413-01 | D-021413-01 | PKNOX1    | 5316   | NM_004571    | 37595549  | CAACAGAUCCAAAGUAGUA  |
| D-008684-01 | D-008684-01 | PLB1      | 151056 | NM_153021    | 23308542  | GCAUAGCCUCUGUUAUUA   |
| D-008339-01 | D-008339-01 | PLCG2     | 5336   | NM_002661    | 117320536 | GGGAAGAACUCCAAGAUU   |
| D-016593-01 | D-016593-01 | C9ORF65   | 158471 | NM_138818    | 34147618  | GCAGAGCGAUCCCAACGUU  |
| D-009662-01 | D-009662-01 | PTPRS     | 5802   | NM_130853    | 104487294 | CCAAUUGCCUCCGAAACAA  |
| D-009328-01 | D-009328-01 | PTPRU     | 10076  | NM_133178    | 110735403 | GCAUUGAUCCUCAGAGUA   |
| D-024516-01 | D-024516-01 | RASGRF2   | 5924   | NM_006909    | 38505169  | CAACAGAGGUGAACAUUUG  |
| D-003170-05 | D-003170-05 | RET       | 5979   | NM_020630    | 126273513 | GCAAAAGCCUGGAGAAGAU  |
| D-011381-01 | D-011381-01 | ROBO1     | 6091   | NM_002941    | 19743804  | GAACAAGAUUUUCGAGCA   |
| D-011824-01 | D-011824-01 | CBFA2T1   | 862    | NM_004349    | 28329413  | AAGCGACCAUGCACUUAUA  |
| D-017115-01 | D-017115-01 | SCN3B     | 55800  | NM_001040151 | 93587331  | GAUGAUUAUUGCUACAGA   |
| D-016982-02 | D-016982-02 | SEMA3D    | 223117 | NM_152754    | 41406085  | GGAAUAGCAUGCUCUCGAU  |
| D-031945-01 | D-031945-01 | SHANK1    | 50944  | NM_016148    | 120587024 | GCGAUUAUCAUUAUAGGA   |
| D-007449-01 | D-007449-01 | SLC22A15  | 55356  | NM_018420    | 24308160  | GGACUGGCUUGUUCUUAUUG |
| D-014620-01 | D-014620-01 | C6ORF29   | 80736  | NM_025257    | 148612886 | GGGAUCAGCGGUCUUAUUG  |
| D-020067-01 | D-020067-01 | SMAD3     | 4088   | NM_005902    | 5174512   | UCAAGAGCCUGGUCUUAUUG |
| D-003902-05 | D-003902-05 | SMAD4     | 4089   | NM_005359    | 34147555  | GUGGCAGUUGGAAUGUUA   |
| D-017440-01 | D-017440-01 | SMTN      | 6525   | NM_006932    | 19913393  | GCGAAGCGCUGGUGAGUAU  |
| D-004722-01 | D-004722-01 | SORL1     | 6653   | NM_003105    | 18379347  | GAGCAAAGAUUCCAGCAUA  |
| D-014103-01 | D-014103-01 | STAB1     | 23166  | NM_015136    | 61743977  | GAACAAGGCUCUGCAAAAG  |
| D-028285-05 | D-028285-05 | CHR415SYT | 401135 | NM_001014372 | 148227420 | AGACGGGUCAGUUCAGAA   |
| D-013116-01 | D-013116-01 | TBX22     | 50945  | NM_016954    | 40316908  | CAAGAUUUUGCCAACUUAU  |
| D-010088-01 | D-010088-01 | TGM3      | 7053   | NM_003245    | 39777600  | GAUUGGUAUAGCGUCUUA   |
| D-004066-02 | D-004066-02 | TLR9      | 54106  | NM_017442    | 20302169  | ACAAUUACCUGGCCUUCUU  |
| D-021879-01 | D-021879-01 | TNN       | 63923  | NM_022093    | 62988323  | CAACUGAGGUGACUACUA   |

|             |             |           |        |              |           |                      |
|-------------|-------------|-----------|--------|--------------|-----------|----------------------|
| D-020535-01 | D-020535-01 | TTL3      | 26140  | NM_001025930 | 109134339 | AGACAGUGGUUCCUGGUAA  |
| D-014513-01 | D-014513-01 | ZNF442    | 79973  | NM_030824    | 112807213 | GAAAGUCGCCAGCCAGAU   |
| D-013957-01 | D-013957-01 | ZNF521    | 25925  | NM_015461    | 24308068  | GUGCGCAUCUUGCCUCAA   |
| D-013382-01 | D-013382-01 | UBB       | 7314   | NM_018955    | 22538474  | GCCGUACUCUUCUGACUA   |
| D-004338-02 | D-004338-02 | PAK6      | 56924  | NM_020168    | 21536446  | UCAACGACUCCAGAGUU    |
| D-013562-01 | D-013562-01 | FBXL2     | 25827  | NM_012157    | 16306581  | GCACAGAACUCCGAAACA   |
| D-007185-01 | D-007185-01 | HUWE1     | 10075  | NM_031407    | 61676187  | GCAAAGAAAUGGAUACAA   |
| D-005030-01 | D-005030-01 | PRKDC     | 5591   | NM_006904    | 31340617  | GCAAAGAGGUGGCAGUUA   |
| D-009421-01 | D-009421-01 | ARHGEF1   | 9138   | NM_004706    | 39777602  | AGAACGAGCUGGAGACAA   |
| D-020314-01 | D-020314-01 | ARHGEF9   | 23229  | NM_015185    | 7662107   | UGGUGAGCUCUAAAGUA    |
| D-009511-01 | D-009511-01 | RAPGEF4   | 11069  | NM_001100397 | 155030205 | GAACAGGCUUCUAAUCAA   |
| D-021159-02 | D-021159-02 | C14ORF115 | 55237  | NM_018228    | 153791243 | UAGAGAAGCUGCCGGAGGA  |
| D-021246-02 | D-021246-02 | CACNA2D3  | 55799  | NM_018398    | 54112396  | GAAUUGGAAUUGGUAU     |
| D-015378-02 | D-015378-02 | CD109     | 135228 | NM_133493    | 115529483 | GGAGUUAGCUUAUUGUA    |
| D-007815-03 | D-007815-03 | C1QR1     | 22918  | NM_012072    | 88758612  | GGACACGCCUUAUCUAAAC  |
| D-013883-02 | D-013883-02 | CLSTN2    | 64084  | NM_022131    | 11545860  | CGACAGAAAUGGCAACAU   |
| D-013870-03 | D-013870-03 | CPAMD8    | 27151  | NM_015692    | 118600976 | ACAAAUUGCUGCCGGGAUG  |
| D-007869-02 | D-007869-02 | CSMD3     | 114788 | NM_052900    | 38045885  | GAAAGAACUUGUUAGCUA   |
| D-011635-03 | D-011635-03 | CUTL1     | 1523   | NM_181500    | 31652237  | GGAUUAGCUGACUGAGUA   |
| D-008971-03 | D-008971-03 | DPP10     | 57628  | NM_001004360 | 85787626  | UGAAUAGAUUCUUGGCAUA  |
| D-003117-06 | D-003117-06 | EPHA3     | 2042   | NM_182644    | 156547125 | GAACUCAGCUCAGAAAGUU  |
| D-003125-06 | D-003125-06 | EPHB6     | 2051   | NM_004445    | 56119211  | GGACCAAGGUGGACACAAU  |
| D-020898-02 | D-020898-02 | SDBCAG84  | 51614  | NM_015966    | 38327613  | CCACGGAGGUGCAUCCUGA  |
| D-025827-02 | D-025827-02 | LOC157697 | 157697 | NM_207332    | 46409303  | GCACACAGUUCUUAUUUU   |
| D-020877-02 | D-020877-02 | EVL       | 51466  | NM_016337    | 50726984  | GAAUUGGGUACCAUCAA    |
| D-013068-03 | D-013068-03 | SEC8L1    | 60412  | NM_001037126 | 82546831  | UAACUGAGUACUUGGAU    |
| D-011853-02 | D-011853-02 | EYA4      | 2070   | NM_172103    | 98991762  | CGAAGGUUCUACUCUUAUG  |
| D-015342-02 | D-015342-02 | FLJ10404  | 54540  | NM_019057    | 154426271 | CGUGUGAACUGGACCAACU  |
| D-011656-02 | D-011656-02 | FBN2      | 2201   | NM_001999    | 66346694  | CGCCAGGGCUGUACAGUA   |
| D-011272-02 | D-011272-02 | FLNC      | 2318   | NM_001458    | 116805321 | GGGCAGAGCUCGUAUGGGA  |
| D-009853-03 | D-009853-03 | FN1       | 2335   | NM_002026    | 47132558  | GAGGAAAUUCUGCAACAACA |
| D-015828-02 | D-015828-02 | CX40.1    | 219770 | NM_153368    | 145699104 | GCACUACUUCUCUUAUGGA  |
| D-011043-02 | D-011043-02 | GLI3      | 2737   | NM_000168    | 119393898 | GCACGAAGGUUGCAACAAG  |
| D-005533-02 | D-005533-02 | GPR112    | 139378 | NM_153834    | 59710092  | GAACAAGAAUGACAUUCUAG |
| D-026468-02 | D-026468-02 | GPR158    | 57512  | NM_020752    | 93204866  | GCUCUACGAAUUCUUAUUA  |
| D-007917-02 | D-007917-02 | GRID1     | 2894   | NM_017551    | 55770851  | GAACAUUAGCCAGUUAUUC  |
| D-004777-02 | D-004777-02 | IGFBP3    | 3486   | NM_000598    | 62243067  | CGUGGUGUGUAGUAAGUA   |
| D-021995-02 | D-021995-02 | KIAA1409  | 57578  | NM_020818    | 150456443 | GAGACUAGCUCUUAAGAA   |
| D-005069-02 | D-005069-02 | KRAS2     | 3845   | NM_004985    | 34485723  | UAAGGACUCUGAAGAUUA   |
| D-012118-02 | D-012118-02 | LAMA1     | 284217 | NM_005559    | 38788415  | CUAAAUAUCUCCAGGAUUC  |
| D-033067-14 | D-033067-14 | LCN9      | 392399 | NM_001001676 | 48717446  | GUACGGACUUGGCCUACAA  |
| D-005648-03 | D-005648-03 | LGR6      | 59352  | NM_001017404 | 62912473  | GAAGAGCUCUGUAGAUUCU  |
| D-012673-03 | D-012673-03 | LRP2      | 4036   | NM_004525    | 126012572 | GAUGGAAGCUAUCGGGUUA  |
| D-017379-02 | D-017379-02 | MCM3AP    | 8888   | NM_003906    | 33469915  | GGACCUAAGUCAUUAUUUG  |
| D-006581-02 | D-006581-02 | MKRN3     | 7681   | NM_005664    | 74272285  | AACCAUUCUUCUGUAUUA   |
| D-005959-04 | D-005959-04 | MMP2      | 4313   | NM_004530    | 75905807  | GCAAACAGGACAUUGUAU   |
| D-015302-02 | D-015302-02 | MYO18B    | 84700  | NM_032608    | 51317365  | UGACAAGCAUCAUUGGUGA  |
| D-031960-02 | D-031960-02 | MYO5C     | 55930  | NM_018728    | 153945714 | GGACAUACAUUCGAGUUCUA |
| D-017529-02 | D-017529-02 | NUF210    | 23225  | NM_024923    | 27477133  | GGUCGAACCUUGGAUACCUA |
| D-003978-03 | D-003978-03 | MGC24137  | 143503 | NM_152430    | 56118308  | GUAAUUCGACAAUUCUUA   |
| D-003728-03 | D-003728-03 | P2RX7     | 5027   | NM_002562    | 34335273  | GAAGGUGUGUAGUGUAUGA  |
| D-005528-02 | D-005528-02 | P2RY14    | 9934   | NM_014879    | 125625351 | GGAAUUAACAACACUUGAAA |
| D-013619-02 | D-013619-02 | PCDH11X   | 27328  | NM_014522    | 7657442   | GACCUUACUUCUGGCUGA   |
| D-013440-02 | D-013440-02 | PCDH9     | 9752   | NM_014005    | 14717405  | GUAAAACCUUCUUGGACUUC |
| D-003018-08 | D-003018-08 | PIK3CA    | 5290   | NM_006218    | 54792081  | GCCAGUACCUCAUGGAUUA  |
| D-021413-02 | D-021413-02 | PKNOX1    | 5316   | NM_004571    | 37595549  | GAUUCAAGUUGUUCAGAGA  |
| D-008684-02 | D-008684-02 | PLB1      | 151056 | NM_153021    | 23308542  | CAGGAAGACUGGAAGAUAA  |
| D-008339-02 | D-008339-02 | PLCG2     | 5336   | NM_002661    | 117320536 | GGAAUAGGAGCACACAAA   |
| D-016593-02 | D-016593-02 | C9ORF65   | 158471 | NM_138818    | 34147618  | GCAGUGUCUGGCGGAGUGA  |
| D-009662-02 | D-009662-02 | PTPRS     | 5802   | NM_130853    | 104487294 | CGAGUGACCUUGAACAAGA  |
| D-009328-02 | D-009328-02 | PTPRU     | 10076  | NM_133178    | 110735403 | GCAAUGAGACCUACCAUGU  |
| D-024516-04 | D-024516-04 | RASGRF2   | 5924   | NM_006909    | 38505169  | GAAGGAACACCAAUUAUA   |
| D-003170-06 | D-003170-06 | RET       | 5979   | NM_020630    | 126273513 | GCACACGGCUGCAUGAGAA  |
| D-011381-02 | D-011381-02 | ROBO1     | 6091   | NM_002941    | 19743804  | GCAGACACGUGCCUAAUA   |
| D-011824-02 | D-011824-02 | CBFA2T1   | 862    | NM_004349    | 28329413  | CGACAACGUUAACUUAUGG  |
| D-017115-02 | D-017115-02 | SCN3B     | 55800  | NM_001040151 | 93587331  | CGUUAAGAUUUCUUAU     |
| D-016982-03 | D-016982-03 | SEMA3D    | 223117 | NM_152754    | 41406085  | GACCACCACUACUACAGAA  |
| D-031945-02 | D-031945-02 | SHANK1    | 50944  | NM_016148    | 120587024 | GAUACAAGACCCGAGUUA   |
| D-007449-02 | D-007449-02 | SLC22A15  | 55356  | NM_018420    | 24308160  | CAACAGAUCCUACAAAGUC  |
| D-014620-03 | D-014620-03 | C6ORF29   | 80736  | NM_025257    | 148612886 | CGUCCUCGUGGAGCCUUU   |
| D-020067-02 | D-020067-02 | SMAD3     | 4088   | NM_005902    | 5174512   | GAGUUCGCCUUAUUAUGA   |
| D-003902-06 | D-003902-06 | SMAD4     | 4089   | NM_005359    | 34147555  | GUACAGAGUUAUCUUAUUA  |
| D-017440-02 | D-017440-02 | SMTN      | 6525   | NM_006932    | 19913393  | CUGAGGAGCUGAUGACUUA  |
| D-004722-02 | D-004722-02 | SORL1     | 6653   | NM_003105    | 18379347  | CCACGUGUCGCCCAUUA    |
| D-014103-02 | D-014103-02 | STAB1     | 23166  | NM_015136    | 61743977  | UCAAGUCGUCGCCUGCAUA  |
| D-028285-06 | D-028285-06 | CHR415SYT | 401135 | NM_001014372 | 148227420 | UAACAAAAGCAGCAUGAGA  |
| D-013116-02 | D-013116-02 | TBX22     | 50945  | NM_016954    | 40316908  | GCACUUAAGUUCUUCUUUC  |
| D-010088-02 | D-010088-02 | TGM3      | 7053   | NM_003245    | 39777600  | ACACAGCGCUGCGGUCUUU  |

|             |             |           |        |              |           |                       |
|-------------|-------------|-----------|--------|--------------|-----------|-----------------------|
| D-004066-03 | D-004066-03 | TLR9      | 54106  | NM_017442    | 20302169  | GACGGCAACUGUUAUJUCA   |
| D-021879-02 | D-021879-02 | TNN       | 63923  | NM_022093    | 62988323  | GGUUAUAAGCUGACAGUUGG  |
| D-020535-02 | D-020535-02 | TTL3      | 26140  | NM_001025930 | 109134339 | CGCAACAUCUGGAUCGUGA   |
| D-014513-02 | D-014513-02 | ZNF442    | 79973  | NM_030824    | 112807213 | ACACAAACAUJUAAGAUA    |
| D-013957-02 | D-013957-02 | ZNF521    | 25925  | NM_015461    | 24308068  | GCCAUUGUCUACCGAGUGUA  |
| D-013382-02 | D-013382-02 | UBB       | 7314   | NM_018955    | 22538474  | GUUAGCAUCUUCGUGAA     |
| D-004338-03 | D-004338-03 | PAK6      | 56924  | NM_020168    | 21536446  | GGACAGCUACGUGAAGAUU   |
| D-013562-02 | D-013562-02 | FBXL2     | 25827  | NM_012157    | 16306581  | GCACACAGUUAAGAAGUA    |
| D-007185-04 | D-007185-04 | HUWE1     | 10075  | NM_031407    | 61676187  | GGAAAGAGCUGAAUUGCUA   |
| D-005030-03 | D-005030-03 | PRKDC     | 5591   | NM_006904    | 31340617  | GAGCAUCACUUGCCUUUAA   |
| D-009421-02 | D-009421-02 | ARHGEF1   | 9138   | NM_004706    | 39777602  | CAACGUCGCCUUUGAACUU   |
| D-020314-02 | D-020314-02 | ARHGEF9   | 23229  | NM_015185    | 7662107   | GAUCUGCAAGUAUCCCUUA   |
| D-009511-02 | D-009511-02 | RAPGEF4   | 11069  | NM_001100397 | 155030205 | GAACACACCUCUCAUUGAA   |
| D-021159-04 | D-021159-04 | C14ORF115 | 55237  | NM_018228    | 153791243 | GAAGAUGCUCACGGAACA    |
| D-021246-03 | D-021246-03 | CACNA2D3  | 55799  | NM_018398    | 54112396  | GCGAUUAAGCUCUACCUAA   |
| D-015378-03 | D-015378-03 | CD109     | 135228 | NM_133493    | 115529483 | UGAAGCCGAUCCUUACAUA   |
| D-007815-04 | D-007815-04 | C1QR1     | 22918  | NM_012072    | 88758612  | AGAAUUGCGCAGACAGUUA   |
| D-013883-03 | D-013883-03 | CLSTN2    | 64084  | NM_022131    | 11545860  | CAGAAAGUCUCCUACAUA    |
| D-013870-04 | D-013870-04 | CPAMD8    | 27151  | NM_015692    | 118600976 | AGAGAGAGACCACGACUA    |
| D-007869-03 | D-007869-03 | CSMD3     | 114788 | NM_052900    | 38045885  | GAAAUUAAGAUUGGAACUCA  |
| D-011635-04 | D-011635-04 | CUTL1     | 1523   | NM_181500    | 31652237  | CCGACGAGAUUGAAUUGAU   |
| D-008971-04 | D-008971-04 | DPP10     | 57628  | NM_001004360 | 85787626  | UCACAGACUUGAAUUGUA    |
| D-003117-08 | D-003117-08 | EPHA3     | 2042   | NM_182644    | 156547125 | GAGCAUCAGUUUACAAAGA   |
| D-003125-07 | D-003125-07 | EPHB6     | 2051   | NM_004445    | 56119211  | UGUGGGAAGUGAUGAGUUA   |
| D-020898-03 | D-020898-03 | SDBCAG84  | 51614  | NM_015966    | 38327613  | UAUAGAGCUCGCGCCCAUGA  |
| D-025827-03 | D-025827-03 | LOC157697 | 157697 | NM_207332    | 46409303  | GAGGAAGACGUUAAAGUA    |
| D-020877-03 | D-020877-03 | EVL       | 51466  | NM_016337    | 50726984  | CGUCAGGAUUCUCUAGAAA   |
| D-013068-17 | D-013068-17 | SEC8L1    | 60412  | NM_001037126 | 82546831  | CCGAGAUUGUGCAGCGGUA   |
| D-011853-03 | D-011853-03 | EYA4      | 2070   | NM_172103    | 98991762  | GCGUUAUUGACAUCGAAUA   |
| D-015342-03 | D-015342-03 | FLJ10404  | 54540  | NM_019057    | 154426271 | GCAGCAGCCUGACAUCAAC   |
| D-011656-03 | D-011656-03 | FBN2      | 2201   | NM_001999    | 66346694  | GGACUGGCCUGUUAUUGUU   |
| D-011272-03 | D-011272-03 | FLNC      | 2318   | NM_001458    | 116805321 | UGACAAGGAUCGACCUAU    |
| D-009853-04 | D-009853-04 | FN1       | 2335   | NM_002026    | 47132558  | GAAGAGACAACAUGAAGUG   |
| D-015828-03 | D-015828-03 | CX40.1    | 219770 | NM_153368    | 145699104 | GGAAAGCUCUGGUUCGUCC   |
| D-011043-03 | D-011043-03 | GLI3      | 2737   | NM_000168    | 119393898 | GCACUUAAGCGUUAACACAGA |
| D-005533-03 | D-005533-03 | GPR112    | 139378 | NM_153834    | 59710092  | GCAACUAGCUCACUUUCA    |
| D-026468-03 | D-026468-03 | GPR158    | 57512  | NM_020752    | 93204866  | GAAUGUGCGUGGCUCCUUAU  |
| D-007917-03 | D-007917-03 | GRID1     | 2894   | NM_017551    | 55770851  | GCACAGCGCCAUUCGGAUU   |
| D-004777-03 | D-004777-03 | IGFBP3    | 3486   | NM_000598    | 62243067  | GAAAGGGCAUCGUAAGAC    |
| D-021995-03 | D-021995-03 | KIAA1409  | 57578  | NM_020818    | 150456443 | GCAAGGACCUAAAGAAUUC   |
| D-005069-03 | D-005069-03 | KRAS2     | 3845   | NM_004985    | 34485723  | GACAAAGUGUGUAAUUAUG   |
| D-012118-03 | D-012118-03 | LAMA1     | 284217 | NM_005559    | 38788415  | CACAUAUCACUCUGGACUUA  |
| D-033067-15 | D-033067-15 | LCN9      | 392399 | NM_001001676 | 48717446  | CCGUUAUUGCAGAGGAACUA  |
| D-005648-17 | D-005648-17 | LRG6      | 59352  | NM_001017404 | 62912473  | GUUUGUGUAGGUGCGGAUU   |
| D-012673-04 | D-012673-04 | LRP2      | 4036   | NM_004525    | 126012572 | UAUCCAGCUGUUGAUUAU    |
| D-017379-03 | D-017379-03 | MCM3AP    | 8888   | NM_003906    | 33469915  | CCAAAUUGCUUCUGGGUUU   |
| D-006581-03 | D-006581-03 | MKRN3     | 7681   | NM_005664    | 74272285  | GGAGAACUGUCGCUAUUCG   |
| D-005959-06 | D-005959-06 | MMP2      | 4313   | NM_004530    | 75905807  | ACAAGAACCAGAUACAAUA   |
| D-015302-03 | D-015302-03 | MYO18B    | 84700  | NM_032608    | 51317365  | GAGGAAAGACGACGAUGUU   |
| D-031960-03 | D-031960-03 | MYO5C     | 55930  | NM_018728    | 153945714 | GAGCCAACAUGAGCACUUA   |
| D-017529-03 | D-017529-03 | NUP210    | 23225  | NM_024923    | 27477133  | UCGCCCAAGCUGAAUUAUA   |
| D-003978-04 | D-003978-04 | MGC24137  | 143503 | NM_152430    | 56118308  | AAUGUCGUCUUAUGGCCUUA  |
| D-003728-04 | D-003728-04 | P2RX7     | 5027   | NM_002562    | 34335273  | GCGAUGGACUUCACAGAUU   |
| D-005528-03 | D-005528-03 | P2RY14    | 9934   | NM_014879    | 125625351 | GCACAAGCUGAAACACUAC   |
| D-013619-03 | D-013619-03 | PCDH11X   | 27328  | NM_014522    | 7657442   | GGAAUUAACCGAGUUAUCAA  |
| D-013440-03 | D-013440-03 | PCDHA9    | 9752   | NM_014005    | 14717405  | UCGGAAGCUCUGGUGAUUA   |
| D-003018-24 | D-003018-24 | PIK3CA    | 5290   | NM_006218    | 54792081  | CUUGAAGAGUGUCGAAUUA   |
| D-021413-03 | D-021413-03 | PKNOX1    | 5316   | NM_004571    | 37595549  | UGGACAAGCAGGCCAUUUA   |
| D-008684-03 | D-008684-03 | PLB1      | 151056 | NM_153021    | 23308542  | GAACUUCACAGACAACAUU   |
| D-008339-03 | D-008339-03 | PLCG2     | 5336   | NM_002661    | 117320536 | CCAAGUUCUUAAGAUUA     |
| D-016593-03 | D-016593-03 | C9ORF65   | 158471 | NM_138818    | 34147618  | GUUCAGUGCUCAGGGUUUA   |
| D-009662-04 | D-009662-04 | PTPRS     | 5802   | NM_130853    | 104487294 | GGACAUGGACUUGGAAGAG   |
| D-009328-04 | D-009328-04 | PTPRU     | 10076  | NM_133178    | 110735403 | GCAGCAAUUGCCUCAUG     |
| D-024516-05 | D-024516-05 | RASGRF2   | 5924   | NM_006909    | 38505169  | CUCGACACCUAUCGUUUUU   |
| D-003170-08 | D-003170-08 | RET       | 5979   | NM_020630    | 126273513 | UUAUUUGGAGUUGCAAUUGA  |
| D-011381-03 | D-011381-03 | ROBO1     | 6091   | NM_002941    | 19743804  | GAUCAACAGUCUCAGUAUA   |
| D-011824-03 | D-011824-03 | CBFA2T1   | 862    | NM_004349    | 28329413  | CCGAUACUGUGGCUCAUUU   |
| D-017115-03 | D-017115-03 | SCN3B     | 55800  | NM_001040151 | 93587331  | GCGCAUCGGCCUUUGUGA    |
| D-016982-04 | D-016982-04 | SEMA3D    | 223117 | NM_152754    | 41406085  | GAUACUGCAUUCACUCGAU   |
| D-031945-03 | D-031945-03 | SHANK1    | 50944  | NM_016148    | 120587024 | GUUACGAGCGUCCUUUUUU   |
| D-007449-03 | D-007449-03 | SLC22A15  | 55356  | NM_018420    | 24308160  | GGACAAGGAGAGCUCUUA    |
| D-014620-04 | D-014620-04 | C6ORF29   | 80736  | NM_025257    | 148612886 | GGUUAUUGGAUUCUUGUUGC  |
| D-020067-03 | D-020067-03 | SMAD3     | 4088   | NM_005902    | 5174512   | GGACGAGGUUCUCCAAAC    |
| D-003902-07 | D-003902-07 | SMAD4     | 4089   | NM_005359    | 34147555  | GAGUUAUUGGUGUUCUUAUG  |
| D-017440-03 | D-017440-03 | SMTN      | 6525   | NM_006932    | 19913393  | UGAACGAUGGAGGAAUUU    |
| D-004722-03 | D-004722-03 | SORL1     | 6653   | NM_003105    | 18379347  | GCACUGGCGUGGAGAGAAA   |
| D-014103-03 | D-014103-03 | STAB1     | 23166  | NM_015136    | 61743977  | GCAAUUGCAUCUUCUGUUC   |
| D-028285-08 | D-028285-08 | CHR415SYT | 401135 | NM_001014372 | 148227420 | UCAAAUGGACCUUAUUUCA   |

|             |             |           |        |              |           |                      |
|-------------|-------------|-----------|--------|--------------|-----------|----------------------|
| D-013116-03 | D-013116-03 | TBX22     | 50945  | NM_016954    | 40316908  | GCAUUUAACCAUUACUUU   |
| D-010088-03 | D-010088-03 | TGM3      | 7053   | NM_003245    | 39777600  | GAACAUCCEAAUAGAUCU   |
| D-004066-04 | D-004066-04 | TLR9      | 54106  | NM_017442    | 20302169  | GGACGGCAACUGUUUAUJAC |
| D-021879-03 | D-021879-03 | TNN       | 63923  | NM_022093    | 62988323  | GCGCUACACUUCUGCUGAU  |
| D-020535-03 | D-020535-03 | TTLL3     | 26140  | NM_001025930 | 109134339 | GAAGAACCUGGACAAUCU   |
| D-014513-03 | D-014513-03 | ZNF442    | 79973  | NM_030824    | 112807213 | AAUCAUGGUUUGUUAUCU   |
| D-013957-03 | D-013957-03 | ZNF521    | 25925  | NM_015461    | 24308068  | GCAUUUCACAUACUGUGAU  |
| D-013382-03 | D-013382-03 | UBB       | 7314   | NM_018955    | 22538474  | GACCAUCACUCUGGAGGUG  |
| D-004338-05 | D-004338-05 | PAK6      | 56924  | NM_020168    | 21536446  | CCAAUGGGCUGGCGUCAA   |
| D-013562-04 | D-013562-04 | FBXL2     | 25827  | NM_012157    | 16306581  | GAUCUGACCUCCUGUGUGU  |
| D-007185-05 | D-007185-05 | HUWE1     | 10075  | NM_031407    | 61676187  | UAACAUCAAUUGUCCACU   |
| D-005030-04 | D-005030-04 | PRKDC     | 5591   | NM_006904    | 31340617  | GAUGAGAAGUCCUAGGUA   |
| D-009421-03 | D-009421-03 | ARHGEF1   | 9138   | NM_004706    | 39777602  | GGUGUGUCUCUACACUGA   |
| D-020314-03 | D-020314-03 | ARHGEF9   | 23229  | NM_015185    | 7662107   | CAAGCGAGUUUAGAGAAU   |
| D-009511-03 | D-009511-03 | RAPGEF4   | 11069  | NM_001100397 | 155030205 | GAAGAUAAGGUCCAAUCU   |
| D-021159-17 | D-021159-17 | C14ORF115 | 55237  | NM_018228    | 153791243 | CCACUGGGCAGACGUUAU   |
| D-021246-04 | D-021246-04 | CACNA2D3  | 55799  | NM_018398    | 54112396  | GGACAAAUUUUCCGCAAA   |
| D-015378-04 | D-015378-04 | CD109     | 135228 | NM_133493    | 115529483 | CCAGGAAGUGAUUCAUA    |
| D-007815-05 | D-007815-05 | C1OR1     | 22918  | NM_012072    | 88758612  | GCGUACCCACCAAGUA     |
| D-013883-04 | D-013883-04 | CLSTN2    | 64084  | NM_022131    | 11545860  | CGGCUAAAGUCAUUAAGCA  |
| D-013870-17 | D-013870-17 | CPAMD8    | 27151  | NM_015692    | 118600976 | GCGUACACCUACACGGCAU  |
| D-007869-04 | D-007869-04 | CSMD3     | 114788 | NM_052900    | 38045885  | GAACGGAGUUUACCUAUU   |
| D-011635-17 | D-011635-17 | CUTL1     | 1523   | NM_181500    | 31652237  | CCGCAACGGUUAUUGCGAA  |
| D-008971-17 | D-008971-17 | DPP10     | 57628  | NM_001004360 | 85787626  | GUUAAAUGGGUAGCAAUA   |
| D-003117-09 | D-003117-09 | EPHA3     | 2042   | NM_182644    | 156547125 | AAAUUGGGGGAUAUUA     |
| D-003125-08 | D-003125-08 | EPHB6     | 2051   | NM_004445    | 56119211  | CGGGAGACCUUACCCUUU   |
| D-020898-04 | D-020898-04 | SDBCAG84  | 51614  | NM_015966    | 38327613  | UGGUGGACUCUACUGAUUC  |
| D-025827-04 | D-025827-04 | LOC157697 | 157697 | NM_207332    | 46409303  | GCACAGGAAGCACGUGUUU  |
| D-020877-04 | D-020877-04 | EVL       | 51466  | NM_016337    | 50726984  | AGCAGGUUGUGAUCAAUA   |
| D-013068-18 | D-013068-18 | SEC8L1    | 60412  | NM_001037126 | 82546831  | ACUGAGUGACCUUCGACUA  |
| D-011853-04 | D-011853-04 | EYA4      | 2070   | NM_172103    | 98991762  | GGAAUUGGCUUUUCGUUA   |
| D-015342-04 | D-015342-04 | FLJ10404  | 54540  | NM_019057    | 154426271 | GCAGACUCUGCAGAAAGUU  |
| D-011656-04 | D-011656-04 | FBN2      | 2201   | NM_001999    | 66346694  | GGUCAGGUGUGCAGAAAUG  |
| D-011272-04 | D-011272-04 | FLNC      | 2318   | NM_001458    | 116805321 | GAACCAUGACGGUACCUUU  |
| D-009853-05 | D-009853-05 | FN1       | 2335   | NM_002026    | 47132558  | GCAGCAACUUCGAAUUA    |
| D-015828-04 | D-015828-04 | CX40.1    | 219770 | NM_153368    | 145699104 | AGGGUACAUCACGGGUGU   |
| D-011043-04 | D-011043-04 | GLI3      | 2737   | NM_000168    | 119393898 | GAUUUACUCUGGUCAGUUC  |
| D-005533-04 | D-005533-04 | GPR112    | 139378 | NM_153834    | 59710092  | GCUCUCAGCUUCCCAUUA   |
| D-026468-04 | D-026468-04 | GPR158    | 57512  | NM_020752    | 93204866  | CGGCAUAGAUAAAGGUGAA  |
| D-007917-04 | D-007917-04 | GRID1     | 2894   | NM_017551    | 55770851  | CAGCAAGGGUUAACGGGAU  |
| D-004777-04 | D-004777-04 | IGFBP3    | 3486   | NM_000598    | 62243067  | GAUAUGGAAGACACACUGA  |
| D-021995-04 | D-021995-04 | KIAA1409  | 57578  | NM_020818    | 150456443 | GGAAAGCAGCUCUCAAUUU  |
| D-005069-04 | D-005069-04 | KRAS2     | 3845   | NM_004985    | 34485723  | GCUCAGGACUUAAGCAAGAA |
| D-012118-04 | D-012118-04 | LAMA1     | 284217 | NM_005559    | 38788415  | GGUCAUUGCUAAUCUGAGA  |
| D-033067-16 | D-033067-16 | LCN9      | 392399 | NM_001001676 | 48717446  | GAACGGCAGCUCUAAUUAU  |
| D-005648-18 | D-005648-18 | LGR6      | 59352  | NM_001017404 | 62912473  | CCGUGUGACUCUAGGAUAG  |
| D-012673-17 | D-012673-17 | LRP2      | 4036   | NM_004525    | 126012572 | GGUAUAGAGUACGAGGAU   |
| D-017379-04 | D-017379-04 | MCM3AP    | 8888   | NM_003906    | 33469915  | GGAAUGCGGUGUUUAUJAC  |
| D-006581-04 | D-006581-04 | MKRN3     | 7681   | NM_005664    | 74272285  | UGGCCAGUCUGUUGUUUAA  |
| D-005959-19 | D-005959-19 | MMP2      | 4313   | NM_004530    | 75905807  | GACCAGAAUACCAUCGAGA  |
| D-015302-04 | D-015302-04 | MYO18B    | 84700  | NM_032608    | 51317365  | GAUUGGACCUUGGCGGUA   |
| D-031960-04 | D-031960-04 | MYO5C     | 55930  | NM_018728    | 153945714 | CAGCAAGCUCUACGUGGAA  |
| D-017529-04 | D-017529-04 | NUP210    | 23225  | NM_024923    | 27477133  | GCAAGUGGACCAUUAJAG   |
| D-003978-18 | D-003978-18 | MGC24137  | 143503 | NM_152430    | 56118308  | AGACAAAGGAGAUUCGACA  |
| D-003728-05 | D-003728-05 | P2RX7     | 5027   | NM_002562    | 34335273  | CGAGAAACAGGCGAUUAU   |
| D-005528-04 | D-005528-04 | P2RY14    | 9934   | NM_014879    | 125625351 | GAAGAUAUACUCUGCUA    |
| D-013619-04 | D-013619-04 | PCDH11X   | 27328  | NM_014522    | 7657442   | GCAAGUGAGUUAUCUGAU   |
| D-013440-04 | D-013440-04 | PCDH9     | 9752   | NM_014005    | 14717405  | UGUAUGGACUUAUGGAUUU  |
| D-003018-25 | D-003018-25 | PIK3CA    | 5290   | NM_006218    | 54792081  | CCUUGAAGAGUUCGAAUU   |
| D-021413-04 | D-021413-04 | PKNOX1    | 5316   | NM_004571    | 37595549  | GACGAAUUCUUCAGCCAAU  |
| D-008684-04 | D-008684-04 | PLB1      | 151056 | NM_153021    | 23308542  | GAUGAUAAUCUACAGAAC   |
| D-008339-04 | D-008339-04 | PLCG2     | 5336   | NM_002661    | 117320536 | CGAGAUAUACACCGAUUG   |
| D-016593-04 | D-016593-04 | C9ORF65   | 158471 | NM_138818    | 34147618  | GCUAAAUAUUUCCGAAUCA  |
| D-009662-05 | D-009662-05 | PTPRS     | 5802   | NM_130853    | 104487294 | CAGGUCACGUUGCUAGUA   |
| D-009328-05 | D-009328-05 | PTPRU     | 10076  | NM_133178    | 110735403 | CGAGAUAUACCCACGUGU   |
| D-024516-06 | D-024516-06 | RASGRF2   | 5924   | NM_006909    | 38505169  | GCACAGUACUUGCUUGACA  |
| D-003170-21 | D-003170-21 | RET       | 5979   | NM_020630    | 126273513 | GCGAGGAGAUUACCGCCU   |
| D-011381-04 | D-011381-04 | ROBO1     | 6091   | NM_002941    | 19743804  | GCAACUCCAAUCUUAUA    |
| D-011824-04 | D-011824-04 | CBFA2T1   | 862    | NM_004349    | 28329413  | GUACUAAAGCGGUGUCAAG  |
| D-017115-17 | D-017115-17 | SCN3B     | 55800  | NM_001040151 | 93587331  | CUUAUUGUUUACGAAGUA   |
| D-016982-17 | D-016982-17 | SEMA3D    | 223117 | NM_152754    | 41406085  | AGGCAGUACCUCCGUAUAA  |
| D-031945-04 | D-031945-04 | SHANK1    | 50944  | NM_016148    | 120587024 | CAGGUGCGGUUCCUUGAAA  |
| D-007449-17 | D-007449-17 | SLC22A15  | 55356  | NM_018420    | 24308160  | CAAAUCAGACCCAGGUAA   |
| D-014620-17 | D-014620-17 | C6ORF29   | 80736  | NM_025257    | 148612886 | AGAACAAGAUAAAGCCGUA  |
| D-020067-04 | D-020067-04 | SMAD3     | 4088   | NM_005902    | 5174512   | GGACGAGUUCUGCGUGAAU  |
| D-003902-08 | D-003902-08 | SMAD4     | 4089   | NM_005359    | 34147555  | GUAAUUGCUCUACGAUUAU  |
| D-017440-04 | D-017440-04 | SMTN      | 6525   | NM_006932    | 19913393  | GUGAGGCGCUCGAGAAUG   |
| D-004722-04 | D-004722-04 | SORL1     | 6653   | NM_003105    | 18379347  | GACAGGAGCUACAAGUAA   |



|             |             |           |        |              |           |                      |
|-------------|-------------|-----------|--------|--------------|-----------|----------------------|
| D-014103-17 | D-014103-17 | STAB1     | 23166  | NM_015136    | 61743977  | GCUUAAGAGUGCCGGCAUC  |
| D-028285-21 | D-028285-21 | CHR415SYT | 401135 | NM_001014372 | 148227420 | UAAGUUAAACUCUACGGAAA |
| D-013116-04 | D-013116-04 | TBX22     | 50945  | NM_016954    | 40316908  | CAACAGAUUACGAAACUAA  |
| D-010088-04 | D-010088-04 | TGM3      | 7053   | NM_003245    | 39777600  | ACAAGGCCUUGGCUCUAA   |
| D-004066-05 | D-004066-05 | TLR9      | 54106  | NM_017442    | 20302169  | CGGCAACUGUUUUUACAAG  |
| D-021879-04 | D-021879-04 | TNN       | 63923  | NM_022093    | 62988323  | CUACACGUCUGCCAACGGA  |
| D-020535-04 | D-020535-04 | TTLL3     | 26140  | NM_001025930 | 109134339 | GAACUCAGGCACCUUGGACA |
| D-014513-04 | D-014513-04 | ZNF442    | 79973  | NM_030824    | 112807213 | GAAGGACUCACAUGGCUGA  |
| D-013957-04 | D-013957-04 | ZNF521    | 25925  | NM_015461    | 24308068  | CACAAAGUCACGCAUAGUA  |
| D-013382-17 | D-013382-17 | UBB       | 7314   | NM_018955    | 22538474  | CCCAGUGACACCAUCGAAA  |
| D-004338-06 | D-004338-06 | PAK6      | 56924  | NM_020168    | 21536446  | GCACCAAUAGGCAUGGAAU  |
| D-013562-17 | D-013562-17 | FBXL2     | 25827  | NM_012157    | 16306581  | GUGCAGGCAUCAAGCGGAU  |
| D-007185-06 | D-007185-06 | HUWE1     | 10075  | NM_031407    | 61676187  | GAAAUGGAUUAACAACGUA  |
| D-005030-05 | D-005030-05 | PRKDC     | 5591   | NM_006904    | 31340617  | GCAGGACCGUGCAAGGUUA  |
| D-009421-04 | D-009421-04 | ARHGEF1   | 9138   | NM_004706    | 39777602  | UGACGUGCGGGUGACUAA   |
| D-020314-04 | D-020314-04 | ARHGEF9   | 23229  | NM_015185    | 7662107   | GAGAUUCCAUCGUUAGUGC  |
| D-009511-04 | D-009511-04 | RAPGEF4   | 11069  | NM_001100397 | 155030205 | GAAACGGGCUCUAAACAAUG |
|             |             |           |        |              |           |                      |
