# Supplementary material
Source: PubMed Central journal article supplement (PMC3494398)
Supplement: cr2012140x7.pdf [file cr2012140x7.pdf]

Supplementary information, Table S2 Fold change in invasion relative to control (TP53-Knockdown)

| siRNA Target | Field Number |      |      |      |      |             |      |      |      |      | Average |
|--------------|--------------|------|------|------|------|-------------|------|------|------|------|---------|
|              | Replicate 1  |      |      |      |      | Replicate 2 |      |      |      |      |         |
|              | 1            | 2    | 3    | 4    | 5    | 6           | 7    | 8    | 9    | 10   |         |
| GPR112       | 54.8         | 51.2 | 76.2 | 31.7 | 69.1 | 22.7        | 19.9 | 16.4 | 22.9 | 14.5 | 37.9    |
| FBXL2        | 27.3         | 13.4 | 29.1 | 19.4 | 20.8 | 42.5        | 32.5 | 4.5  | 46.3 | 31.6 | 26.7    |
| ZNF442       | 14.9         | 16.2 | 21.2 | 13.7 | 22.1 | 14.6        | 12.6 | 13.1 | 17.5 | 11.5 | 15.8    |
| TGM3         | 15.3         | 11.0 | 19.6 | 18.2 | 21.8 | 9.3         | 18.9 | 13.9 | 13.4 | 12.6 | 15.4    |
| GPR158       | 21.0         | 19.0 | 24.6 | 13.4 | 16.0 | 14.7        | 8.7  | 16.1 | 9.0  | 7.2  | 15.0    |
| ADAMTS18     | 6.5          | 15.2 | 10.5 | 13.2 | 13.8 | 18.7        | 7.2  | 24.3 | 15.9 | 14.2 | 13.9    |
| HUWE1        | 11.4         | 10.5 | 12.6 | 10.2 | 3.4  | 4.1         | 27.3 | 4.1  | 11.2 | 25.5 | 12.0    |
| TBX22        | 8.9          | 11.8 | 14.1 | 10.0 | 12.9 | 11.2        | 15.8 | 9.5  | 16.4 | 8.6  | 11.9    |
| FN1          | 16.6         | 12.5 | 13.1 | 18.2 | 13.8 | 13.6        | 8.0  | 6.3  | 5.7  | 7.3  | 11.5    |
| CD109        | 19.2         | 11.9 | 17.4 | 14.4 | 10.3 | 6.8         | 8.6  | 7.5  | 7.9  | 4.5  | 10.9    |
| MAP2K7       | 20.8         | 7.3  | 3.7  | 14.9 | 16.9 | 8.9         | 5.1  | 10.2 | 6.5  | 7.9  | 10.2    |
| GALNS        | 6.7          | 11.9 | 12.4 | 10.5 | 14.2 | 3.0         | 9.1  | 6.2  | 6.1  | 7.0  | 8.7     |
| NAV3         | 10.0         | 10.5 | 12.7 | 11.1 | 8.3  | 8.2         | 4.8  | 8.0  | 6.4  | 6.8  | 8.7     |
| ERGIC3       | 8.4          | 7.4  | 8.1  | 7.7  | 7.0  | 5.8         | 5.1  | 10.8 | 6.7  | 7.9  | 7.5     |
| TNN          | 7.0          | 6.8  | 7.8  | 8.0  | 10.8 | 6.7         | 3.1  | 6.0  | 8.6  | 9.2  | 7.4     |
| SYT14L       | 11.6         | 6.8  | 6.5  | 6.5  | 7.4  | 3.5         | 9.7  | 3.7  | 9.3  | 8.0  | 7.3     |
| GRM1         | 8.8          | 9.4  | 6.9  | 16.3 | 10.9 | 1.6         | 6.5  | 2.5  | 5.1  | 5.0  | 7.3     |
| SEMA3D       | 11.4         | 7.2  | 6.7  | 10.7 | 7.3  | 4.4         | 7.5  | 9.4  | 3.7  | 2.8  | 7.1     |
| ARHGEF10     | 10.0         | 8.6  | 6.8  | 6.6  | 7.0  | 5.3         | 6.4  | 6.4  | 5.2  | 5.8  | 6.8     |
| GJD4         | 12.2         | 7.4  | 5.6  | 9.5  | 8.4  | 4.9         | 4.7  | 5.5  | 5.0  | 4.1  | 6.7     |
| GUCY1A2      | 13.7         | 6.0  | 7.9  | 8.5  | 9.8  | 3.9         | 2.6  | 4.6  | 3.1  | 3.9  | 6.4     |
| DTNB         | 3.5          | 12.4 | 6.8  | 2.9  | 6.5  | 6.5         | 6.0  | 7.3  | 4.9  | 7.3  | 6.4     |
| ERICH1       | 6.2          | 8.2  | 8.8  | 7.7  | 6.2  | 3.7         | 3.6  | 6.7  | 5.8  | 5.8  | 6.2     |
| STAB1        | 5.1          | 8.6  | 9.1  | 7.0  | 9.7  | 4.3         | 3.0  | 3.5  | 4.1  | 2.0  | 5.6     |
| PRDM9        | 5.4          | 3.5  | 3.7  | 4.1  | 3.6  | 4.6         | 10.3 | 5.2  | 7.5  | 8.0  | 5.6     |
| ALK          | 6.7          | 7.9  | 4.2  | 7.3  | 5.1  | 3.6         | 6.8  | 4.0  | 5.2  | 4.8  | 5.6     |
| ADARB2       | 5.1          | 7.5  | 4.2  | 4.2  | 3.3  | 7.5         | 7.3  | 5.6  | 3.2  | 7.0  | 5.5     |
| RNF219       | 5.8          | 6.2  | 6.8  | 4.1  | 11.9 | 4.5         | 4.2  | 4.4  | 3.5  | 3.1  | 5.4     |
| ZMYM4        | 5.4          | 6.9  | 5.6  | 8.3  | 4.2  | 5.5         | 3.6  | 4.8  | 4.5  | 4.8  | 5.4     |
| CACNA2D3     | 5.1          | 4.4  | 4.0  | 3.4  | 2.9  | 5.1         | 8.5  | 8.1  | 5.6  | 5.9  | 5.3     |
| HIST1H1B     | 4.6          | 3.8  | 4.7  | 6.2  | 7.1  | 4.0         | 4.4  | 4.1  | 5.9  | 7.9  | 5.3     |
| C10orf137    | 8.8          | 6.8  | 6.6  | 3.3  | 3.2  | 2.1         | 6.6  | 3.4  | 7.1  | 2.7  | 5.1     |
| TLR9         | 4.7          | 6.0  | 5.7  | 6.4  | 5.4  | 2.5         | 6.6  | 3.7  | 2.1  | 4.6  | 4.8     |
| SMAD3        | 3.4          | 1.0  | 4.0  | 2.7  | 2.6  | 7.6         | 3.3  | 8.1  | 7.7  | 2.3  | 4.3     |
| FBXW7        | 4.9          | 2.9  | 4.2  | 4.3  | 4.6  | 4.1         | 3.8  | 5.5  | 3.6  | 4.2  | 4.2     |
| SHANK1       | 1.5          | 5.5  | 4.8  | 0.6  | 3.8  | 0.4         | 6.5  | 6.1  | 9.0  | 3.8  | 4.2     |
| EYA4         | 7.1          | 3.1  | 5.7  | 2.3  | 5.4  | 0.7         | 3.2  | 3.0  | 4.5  | 4.6  | 4.0     |
| COL3A1       | 2.5          | 2.8  | 3.7  | 2.8  | 2.5  | 6.6         | 5.7  | 4.4  | 4.4  | 3.8  | 3.9     |
| SYNE1        | 9.9          | 2.2  | 7.4  | 3.8  | 7.5  | 2.2         | 1.2  | 1.7  | 2.2  | 1.2  | 3.9     |
| MMP2         | 3.0          | 3.5  | 2.7  | 2.9  | 3.0  | 3.2         | 9.5  | 1.4  | 3.7  | 6.4  | 3.9     |
| ADAMTSL3     | 3.4          | 3.6  | 5.1  | 3.2  | 3.0  | 3.4         | 5.6  | 3.0  | 4.9  | 3.6  | 3.9     |
| SMAD2        | 2.6          | 4.1  | 1.8  | 2.3  | 2.3  | 4.6         | 4.1  | 4.2  | 6.9  | 2.7  | 3.6     |
| OR51E1       | 2.8          | 3.5  | 3.6  | 3.4  | 0.9  | 8.6         | 2.5  | 3.8  | 2.8  | 3.3  | 3.5     |
| EVL          | 3.6          | 2.6  | 5.6  | 2.6  | 3.8  | 4.0         | 2.6  | 2.5  | 2.9  | 3.4  | 3.4     |
| OBSCN        | 3.9          | 2.8  | 3.0  | 3.0  | 3.4  | 2.4         | 1.3  | 4.5  | 3.3  | 5.2  | 3.3     |
| P2RY14       | 5.9          | 1.9  | 1.3  | 3.8  | 2.4  | 4.7         | 3.6  | 1.4  | 4.8  | 2.3  | 3.2     |
| CUX1         | 4.9          | 1.9  | 3.2  | 6.2  | 5.2  | 2.3         | 1.8  | 1.4  | 2.6  | 1.5  | 3.1     |
| C15orf2      | 2.1          | 2.6  | 2.6  | 2.9  | 4.4  | 3.7         | 2.5  | 4.4  | 3.1  | 2.4  | 3.1     |
| EPHB6        | 3.2          | 1.5  | 2.1  | 3.8  | 1.9  | 2.2         | 2.7  | 3.6  | 3.4  | 6.0  | 3.0     |
| RAPGEF4      | 6.3          | 1.9  | 4.8  | 9.0  | 1.6  | 1.2         | 0.9  | 2.5  | 1.2  | 0.6  | 3.0     |
| PTPRU        | 2.9          | 3.8  | 3.6  | 3.0  | 3.1  | 2.1         | 1.8  | 3.0  | 2.7  | 2.5  | 2.8     |

|           |     |     |     |     |     |     |     |     |     |     |     |
|-----------|-----|-----|-----|-----|-----|-----|-----|-----|-----|-----|-----|
| UHRF2     | 1.2 | 2.7 | 3.1 | 1.6 | 1.6 | 3.4 | 2.1 | 5.5 | 3.6 | 3.4 | 2.8 |
| PTPRD     | 2.2 | 3.7 | 3.1 | 1.7 | 2.6 | 2.9 | 2.1 | 2.9 | 3.6 | 2.8 | 2.8 |
| KIAA1409  | 1.2 | 4.2 | 1.5 | 2.0 | 1.7 | 4.9 | 2.2 | 2.7 | 3.3 | 3.1 | 2.7 |
| KCNQ5     | 3.3 | 2.0 | 2.5 | 3.0 | 3.5 | 1.2 | 3.7 | 2.2 | 2.9 | 2.4 | 2.7 |
| AKAP6     | 2.2 | 3.3 | 2.1 | 2.3 | 2.1 | 2.6 | 4.1 | 2.7 | 2.6 | 2.7 | 2.7 |
| TAF2      | 1.8 | 3.3 | 4.4 | 2.2 | 1.6 | 2.7 | 2.9 | 3.5 | 1.2 | 2.5 | 2.6 |
| C10orf115 | 2.7 | 3.0 | 1.6 | 2.5 | 1.0 | 3.3 | 3.2 | 2.9 | 2.5 | 3.4 | 2.6 |
| NOS3      | 4.0 | 2.7 | 2.9 | 4.1 | 4.0 | 2.3 | 0.7 | 1.2 | 1.2 | 1.2 | 2.4 |
| TGFBR2    | 2.4 | 3.8 | 2.3 | 4.4 | 1.1 | 2.5 | 0.8 | 3.2 | 1.6 | 2.1 | 2.4 |
| FAM193B   | 1.8 | 1.8 | 1.6 | 2.6 | 2.1 | 2.9 | 3.5 | 3.1 | 2.1 | 2.2 | 2.4 |
| SMTN      | 2.4 | 3.4 | 2.8 | 2.5 | 1.9 | 2.3 | 2.1 | 1.2 | 2.7 | 2.4 | 2.4 |
| ADAMTS15  | 5.6 | 2.9 | 1.6 | 3.0 | 2.5 | 1.5 | 0.9 | 1.1 | 1.5 | 2.2 | 2.3 |
| CLSTN2    | 1.9 | 1.0 | 1.9 | 1.2 | 2.3 | 2.5 | 4.1 | 2.6 | 2.3 | 3.0 | 2.3 |
| TIAM1     | 2.0 | 2.8 | 3.4 | 1.6 | 2.3 | 2.1 | 1.2 | 2.9 | 2.1 | 1.8 | 2.2 |
| HAPLN1    | 1.4 | 2.1 | 3.8 | 2.5 | 1.7 | 2.8 | 1.9 | 2.4 | 1.2 | 2.4 | 2.2 |
| PRKDC     | 0.9 | 3.3 | 4.2 | 1.0 | 2.0 | 2.9 | 0.6 | 4.0 | 2.3 | 0.7 | 2.2 |
| ABCB11    | 2.0 | 2.4 | 2.1 | 0.9 | 1.6 | 2.2 | 2.6 | 2.4 | 2.2 | 3.4 | 2.2 |
| CNTN4     | 2.5 | 2.2 | 3.3 | 2.8 | 2.8 | 1.6 | 1.8 | 1.5 | 1.1 | 2.2 | 2.2 |
| LAMA1     | 2.7 | 3.8 | 3.4 | 1.5 | 2.7 | 2.2 | 1.1 | 2.1 | 1.4 | 0.7 | 2.2 |
| ERCC6     | 0.7 | 2.1 | 3.1 | 2.0 | 1.6 | 1.7 | 2.2 | 1.8 | 2.6 | 3.4 | 2.1 |
| GLI3      | 2.7 | 3.4 | 2.4 | 3.9 | 1.8 | 1.4 | 1.6 | 1.7 | 0.9 | 1.4 | 2.1 |
| BCL9      | 2.1 | 3.7 | 2.5 | 1.0 | 1.4 | 1.1 | 2.2 | 1.8 | 1.5 | 4.0 | 2.1 |
| CD248     | 3.0 | 3.3 | 1.7 | 1.6 | 2.5 | 2.0 | 2.0 | 1.4 | 1.4 | 2.3 | 2.1 |
| MAPK8IP2  | 1.3 | 1.5 | 3.0 | 2.0 | 2.0 | 1.2 | 2.5 | 3.0 | 1.7 | 2.8 | 2.1 |
| CD46      | 2.1 | 2.7 | 3.2 | 1.5 | 1.6 | 0.8 | 0.6 | 1.5 | 1.5 | 5.2 | 2.1 |
| CD93      | 2.3 | 1.1 | 1.6 | 2.3 | 1.5 | 1.2 | 2.5 | 1.6 | 3.2 | 3.2 | 2.1 |
| IRS4      | 1.1 | 1.3 | 3.2 | 2.4 | 5.1 | 2.3 | 1.2 | 0.8 | 1.0 | 2.1 | 2.1 |
| MKRN3     | 0.6 | 1.8 | 1.2 | 1.0 | 1.3 | 4.5 | 2.3 | 2.1 | 3.1 | 2.5 | 2.0 |
| TTL3      | 0.9 | 1.2 | 1.3 | 2.5 | 3.1 | 1.4 | 1.9 | 2.0 | 2.9 | 3.1 | 2.0 |
| SCN3B     | 1.8 | 2.5 | 4.0 | 3.1 | 3.0 | 1.9 | 0.4 | 1.0 | 1.7 | 0.8 | 2.0 |
| CPAMD8    | 1.1 | 2.5 | 1.4 | 2.2 | 2.3 | 2.6 | 2.1 | 1.2 | 1.9 | 2.3 | 2.0 |
| P2RX7     | 4.3 | 3.5 | 1.9 | 1.9 | 1.5 | 1.3 | 1.9 | 0.6 | 1.6 | 0.9 | 1.9 |
| ARHGFE9   | 1.2 | 2.3 | 2.9 | 3.2 | 2.4 | 0.5 | 1.3 | 4.5 | 0.2 | 0.8 | 1.9 |
| ACSL5     | 1.1 | 1.4 | 1.3 | 1.9 | 1.6 | 2.4 | 1.1 | 2.0 | 2.9 | 3.3 | 1.9 |
| EPHA3     | 1.1 | 1.1 | 1.1 | 2.3 | 0.7 | 5.2 | 1.2 | 1.4 | 1.6 | 2.7 | 1.8 |
| ARHGFE1   | 0.7 | 0.4 | 2.0 | 0.2 | 0.4 | 1.1 | 2.0 | 3.8 | 2.8 | 4.6 | 1.8 |
| FAM161A   | 0.9 | 1.8 | 2.0 | 1.4 | 1.3 | 2.3 | 2.4 | 0.8 | 2.2 | 2.9 | 1.8 |
| PIK3CA    | 2.7 | 2.1 | 2.5 | 1.2 | 1.2 | 1.6 | 2.3 | 1.5 | 1.5 | 1.3 | 1.8 |
| PKNOX1    | 2.6 | 1.6 | 1.2 | 1.7 | 0.7 | 3.4 | 1.9 | 1.8 | 2.0 | 0.9 | 1.8 |
| SH3TC1    | 1.1 | 2.8 | 1.8 | 1.3 | 2.2 | 1.5 | 1.8 | 1.9 | 1.9 | 1.4 | 1.8 |
| ATP11A    | 2.2 | 1.9 | 1.8 | 0.1 | 1.5 | 2.6 | 1.6 | 1.8 | 1.5 | 2.2 | 1.7 |
| TP53      | 1.2 | 1.4 | 1.8 | 1.9 | 1.9 | 1.2 | 2.2 | 1.0 | 2.2 | 2.0 | 1.7 |
| GNAS      | 0.7 | 0.4 | 1.5 | 2.6 | 1.6 | 2.5 | 2.2 | 2.5 | 1.1 | 1.5 | 1.7 |
| ABCA1     | 1.1 | 2.6 | 1.2 | 1.9 | 2.0 | 0.9 | 1.4 | 1.6 | 1.5 | 2.3 | 1.7 |
| MAP2      | 2.6 | 1.1 | 1.2 | 1.4 | 2.5 | 1.4 | 1.2 | 2.0 | 1.2 | 1.7 | 1.6 |
| NUP210    | 1.9 | 2.0 | 2.4 | 1.7 | 1.8 | 1.6 | 1.0 | 1.3 | 1.6 | 1.0 | 1.6 |
| F8        | 1.3 | 1.2 | 0.4 | 1.0 | 0.6 | 4.0 | 0.6 | 4.7 | 1.5 | 0.9 | 1.6 |
| PCDH11X   | 0.6 | 2.1 | 2.2 | 2.6 | 1.5 | 1.6 | 1.2 | 1.7 | 1.3 | 1.2 | 1.6 |
| ADAMTS20  | 0.5 | 1.2 | 0.4 | 0.8 | 1.2 | 2.2 | 3.1 | 2.6 | 1.6 | 1.9 | 1.5 |
| CSMD3     | 2.1 | 1.8 | 1.9 | 2.2 | 2.5 | 1.9 | 1.1 | 0.8 | 0.5 | 0.5 | 1.5 |
| ZNF521    | 2.1 | 1.0 | 2.2 | 3.7 | 3.5 | 0.3 | 1.6 | 0.1 | 0.2 | 0.5 | 1.5 |
| RUNX1T1   | 1.6 | 1.8 | 1.6 | 1.6 | 1.6 | 0.8 | 2.0 | 1.8 | 0.3 | 1.6 | 1.5 |
| KIAA0556  | 1.0 | 1.2 | 2.0 | 0.9 | 1.3 | 2.8 | 0.5 | 1.3 | 1.6 | 2.0 | 1.5 |
| AKAP12    | 1.7 | 1.3 | 2.2 | 1.4 | 2.2 | 0.5 | 2.0 | 1.1 | 0.7 | 1.5 | 1.5 |
| SFRS6     | 1.0 | 1.6 | 1.1 | 1.8 | 2.0 | 1.1 | 0.8 | 0.8 | 1.5 | 2.0 | 1.4 |
| SLC29A1   | 1.5 | 2.2 | 1.2 | 1.9 | 2.2 | 0.9 | 0.8 | 0.5 | 1.4 | 0.8 | 1.3 |
| DSCAML1   | 1.2 | 0.4 | 0.8 | 2.6 | 0.7 | 0.9 | 1.5 | 1.6 | 1.8 | 1.5 | 1.3 |

|          |     |     |     |     |     |     |     |     |     |     |     |
|----------|-----|-----|-----|-----|-----|-----|-----|-----|-----|-----|-----|
| RET      | 1.1 | 3.0 | 1.2 | 1.3 | 2.7 | 0.9 | 0.7 | 0.4 | 1.1 | 0.7 | 1.3 |
| NTNG1    | 0.6 | 1.0 | 1.1 | 1.6 | 1.6 | 0.6 | 2.2 | 1.4 | 1.0 | 1.6 | 1.3 |
| SLC44A4  | 1.8 | 0.9 | 0.9 | 2.0 | 2.1 | 1.0 | 0.5 | 0.9 | 1.5 | 1.0 | 1.3 |
| TCERG1L  | 1.1 | 1.1 | 1.0 | 1.6 | 0.3 | 1.5 | 1.2 | 1.4 | 1.9 | 1.1 | 1.2 |
| DPP10    | 1.1 | 1.4 | 1.2 | 0.1 | 1.6 | 0.8 | 1.9 | 1.2 | 1.1 | 1.1 | 1.2 |
| ROBO1    | 1.1 | 1.9 | 1.5 | 0.9 | 1.3 | 1.3 | 0.7 | 1.0 | 1.2 | 0.7 | 1.1 |
| MLL3     | 1.8 | 1.3 | 0.9 | 1.4 | 1.1 | 0.8 | 0.3 | 1.1 | 1.2 | 1.0 | 1.1 |
| ADAM29   | 1.4 | 1.2 | 1.2 | 1.1 | 1.1 | 0.8 | 0.6 | 1.1 | 1.5 | 1.0 | 1.1 |
| MYO18B   | 1.0 | 0.4 | 1.4 | 1.1 | 1.3 | 2.0 | 1.1 | 0.8 | 0.7 | 0.9 | 1.1 |
| PTEN     | 1.3 | 0.9 | 1.0 | 0.6 | 1.3 | 1.1 | 0.9 | 1.5 | 0.7 | 1.2 | 1.1 |
| SORL1    | 0.4 | 2.0 | 1.1 | 1.1 | 1.4 | 1.0 | 1.1 | 0.2 | 0.6 | 1.4 | 1.1 |
| FLNC     | 1.1 | 0.9 | 1.1 | 1.0 | 0.6 | 1.3 | 0.5 | 1.4 | 1.5 | 1.1 | 1.0 |
| ACAN     | 0.6 | 1.1 | 1.1 | 1.0 | 1.4 | 0.7 | 1.1 | 0.7 | 0.9 | 1.9 | 1.0 |
| KIAA2022 | 0.5 | 0.9 | 0.5 | 1.1 | 1.9 | 0.9 | 0.6 | 1.3 | 0.9 | 1.6 | 1.0 |
| Control  | 1.0 | 1.0 | 1.0 | 1.0 | 1.0 | 1.0 | 1.0 | 1.0 | 1.0 | 1.0 | 1.0 |
| PAK6     | 2.1 | 1.2 | 1.0 | 0.9 | 1.4 | 1.0 | 0.2 | 0.1 | 0.6 | 0.8 | 0.9 |
| APC      | 1.9 | 1.1 | 1.2 | 1.1 | 0.5 | 0.5 | 1.0 | 0.5 | 0.7 | 0.7 | 0.9 |
| EXOC4    | 0.4 | 1.1 | 0.6 | 0.7 | 0.7 | 1.3 | 1.6 | 0.9 | 0.7 | 1.4 | 0.9 |
| NF1      | 1.3 | 1.1 | 2.2 | 1.1 | 0.9 | 0.6 | 0.4 | 0.5 | 0.4 | 0.6 | 0.9 |
| UQCRC2   | 0.6 | 0.7 | 1.0 | 0.8 | 1.2 | 0.6 | 1.1 | 0.6 | 1.2 | 1.2 | 0.9 |
| PHIP     | 1.1 | 0.9 | 0.8 | 2.0 | 1.2 | 0.8 | 0.8 | 0.6 | 0.3 | 0.5 | 0.9 |
| LRP2     | 1.4 | 0.7 | 0.8 | 0.7 | 1.1 | 1.1 | 0.6 | 0.9 | 0.8 | 0.5 | 0.9 |
| GRID1    | 0.9 | 1.2 | 0.7 | 1.4 | 0.6 | 0.7 | 0.5 | 0.8 | 0.8 | 1.0 | 0.9 |
| SMAD4    | 0.3 | 0.3 | 1.0 | 0.8 | 2.6 | 0.7 | 0.4 | 0.6 | 0.8 | 0.9 | 0.9 |
| CHL1     | 1.0 | 0.8 | 0.8 | 0.6 | 0.4 | 1.1 | 1.5 | 0.7 | 0.7 | 0.9 | 0.9 |
| MYO5C    | 1.3 | 1.6 | 0.9 | 1.0 | 0.5 | 0.7 | 0.6 | 0.7 | 0.8 | 0.4 | 0.9 |
| KRT73    | 0.5 | 1.0 | 0.7 | 0.8 | 0.9 | 0.6 | 0.5 | 1.1 | 0.6 | 1.3 | 0.8 |
| LGR6     | 1.3 | 0.4 | 0.8 | 0.4 | 0.7 | 1.2 | 0.7 | 1.0 | 0.9 | 0.8 | 0.8 |
| PRKD1    | 1.8 | 1.0 | 1.1 | 0.3 | 1.7 | 0.2 | 0.6 | 0.2 | 0.8 | 0.3 | 0.8 |
| ITGAE    | 0.5 | 1.2 | 1.0 | 0.9 | 1.0 | 0.6 | 0.9 | 0.5 | 0.5 | 0.6 | 0.8 |
| ATP13A1  | 1.5 | 0.2 | 0.4 | 1.2 | 1.1 | 0.3 | 0.5 | 1.2 | 0.3 | 1.2 | 0.8 |
| MCM3AP   | 0.7 | 0.7 | 0.8 | 0.5 | 1.1 | 1.1 | 0.7 | 0.9 | 0.6 | 0.7 | 0.8 |
| MAP1B    | 1.2 | 1.0 | 0.8 | 0.9 | 0.8 | 0.8 | 0.5 | 0.5 | 0.2 | 0.4 | 0.7 |
| IGSF22   | 0.5 | 0.6 | 0.6 | 0.6 | 0.7 | 1.1 | 0.7 | 0.9 | 0.3 | 1.1 | 0.7 |
| FBN2     | 0.7 | 0.9 | 0.6 | 0.5 | 0.6 | 0.9 | 0.4 | 1.2 | 0.5 | 0.6 | 0.7 |
| RASGRF2  | 0.9 | 1.0 | 0.6 | 0.8 | 1.2 | 0.3 | 0.3 | 0.7 | 0.4 | 0.5 | 0.7 |
| ATP13A5  | 0.6 | 0.5 | 0.5 | 0.5 | 0.6 | 0.4 | 0.4 | 1.5 | 0.5 | 1.2 | 0.7 |
| PLB1     | 0.5 | 0.6 | 0.6 | 0.7 | 0.4 | 0.3 | 0.7 | 1.3 | 0.6 | 0.5 | 0.6 |
| KIAA0182 | 0.5 | 0.7 | 0.5 | 1.0 | 0.9 | 0.4 | 0.5 | 0.6 | 0.4 | 0.4 | 0.6 |
| LMO7     | 0.2 | 0.6 | 0.4 | 0.5 | 0.4 | 0.6 | 1.2 | 0.7 | 0.6 | 0.7 | 0.6 |
| TCF7L2   | 0.5 | 1.0 | 1.5 | 0.6 | 0.8 | 0.4 | 0.1 | 0.1 | 0.1 | 0.5 | 0.6 |
| KRAS     | 0.5 | 0.5 | 0.8 | 0.7 | 0.7 | 0.2 | 0.8 | 0.3 | 0.7 | 0.5 | 0.6 |
| IGFBP3   | 0.6 | 0.3 | 0.5 | 0.9 | 0.9 | 0.9 | 0.5 | 0.2 | 0.3 | 0.3 | 0.5 |
| MYO19    | 0.3 | 0.4 | 0.1 | 0.4 | 0.5 | 0.6 | 0.5 | 0.6 | 0.9 | 1.0 | 0.5 |
| LCN9     | 0.7 | 0.5 | 0.5 | 0.5 | 0.6 | 0.5 | 0.4 | 0.5 | 0.4 | 0.5 | 0.5 |
| SLC22A15 | 0.7 | 0.6 | 0.2 | 0.3 | 0.3 | 0.8 | 0.4 | 0.3 | 0.4 | 0.5 | 0.5 |
| PRUNE2   | 0.2 | 0.3 | 0.1 | 0.2 | 0.5 | 0.3 | 0.5 | 0.7 | 0.5 | 0.5 | 0.4 |
| PCDHA9   | 0.4 | 0.3 | 0.4 | 0.5 | 0.5 | 0.2 | 0.3 | 0.5 | 0.2 | 0.1 | 0.4 |
| PLCG2    | 0.1 | 0.1 | 0.2 | 0.1 | 0.3 | 0.1 | 0.4 | 0.1 | 0.3 | 0.4 | 0.2 |
| UBB      | 0.0 | 0.0 | 0.4 | 0.1 | 0.4 | 0.0 | 0.2 | 0.0 | 0.2 | 0.2 | 0.2 |
| PTPRS    | 0.3 | 0.0 | 0.1 | 0.2 | 0.1 | 0.2 | 0.2 | 0.0 | 0.2 | 0.1 | 0.1 |
