# Supplementary material
Source: PubMed Central journal article supplement (PMC3494398)
Supplement: cr2012140x8.pdf [file cr2012140x8.pdf]

**Supplementary information, Table S3** Fold change in invasion relative to control (Oncogenic KRAS)

| siRNA Target | Field Number |      |      |      |      |             |      |      |      |      | Average |
|--------------|--------------|------|------|------|------|-------------|------|------|------|------|---------|
|              | Replicate 1  |      |      |      |      | Replicate 2 |      |      |      |      |         |
|              | 1            | 2    | 3    | 4    | 5    | 6           | 7    | 8    | 9    | 10   |         |
| GPR158       | 61.0         | 73.0 | 37.3 | 45.5 | 47.3 | 46.8        | 66.8 | 46.3 | 59.8 | 49.3 | 53.3    |
| GPR112       | 22.5         | 53.8 | 52.6 | 61.1 | 50.1 | 49.0        | 26.4 | 43.1 | 12.9 | 12.3 | 38.4    |
| KCNQ5        | 13.3         | 14.3 | 12.3 | 19.7 | 12.7 | 48.0        | 55.0 | 83.7 | 39.7 | 56.0 | 35.5    |
| SHANK1       | 24.6         | 38.6 | 36.7 | 21.2 | 17.9 | 34.5        | 27.1 | 35.3 | 33.5 | 24.5 | 29.4    |
| ADAMTS18     | 14.2         | 42.6 | 15.9 | 26.6 | 25.1 | 18.2        | 28.9 | 20.5 | 16.6 | 26.8 | 23.6    |
| NAV3         | 25.3         | 21.7 | 16.0 | 58.7 | 29.0 | 17.3        | 2.7  | 11.0 | 20.3 | 4.7  | 20.7    |
| HIST1H1B     | 26.7         | 17.3 | 17.3 | 29.0 | 25.3 | 13.3        | 13.3 | 18.7 | 8.3  | 19.7 | 18.9    |
| SMAD2        | 28.8         | 24.4 | 18.8 | 9.4  | 23.1 | 17.5        | 3.1  | 2.5  | 41.3 | 10.0 | 17.9    |
| FBXL2        | 10.9         | 15.3 | 11.4 | 13.5 | 14.6 | 22.9        | 12.6 | 20.8 | 26.4 | 28.6 | 17.7    |
| RNF219       | 15.0         | 20.6 | 13.8 | 15.0 | 15.6 | 18.1        | 13.1 | 18.1 | 23.8 | 20.0 | 17.3    |
| ERGIC3       | 14.2         | 15.0 | 20.8 | 12.1 | 17.5 | 22.5        | 16.3 | 17.1 | 20.4 | 15.8 | 17.2    |
| FN1          | 15.3         | 16.1 | 11.5 | 19.8 | 7.4  | 21.6        | 27.0 | 12.9 | 19.5 | 16.5 | 16.8    |
| P2RY14       | 16.9         | 15.9 | 17.5 | 8.1  | 8.3  | 16.9        | 10.0 | 10.3 | 7.5  | 8.3  | 12.0    |
| GLI3         | 23.4         | 7.3  | 7.6  | 30.5 | 7.6  | 11.9        | 9.9  | 4.5  | 7.9  | 4.0  | 11.5    |
| SCN3B        | 13.6         | 12.9 | 10.2 | 15.3 | 20.0 | 10.2        | 9.8  | 4.7  | 5.4  | 10.2 | 11.2    |
| LAMA1        | 16.1         | 10.9 | 8.0  | 11.8 | 4.8  | 13.1        | 16.6 | 9.3  | 12.0 | 3.8  | 10.6    |
| ADARB2       | 15.4         | 5.0  | 7.5  | 12.9 | 10.4 | 7.5         | 7.1  | 8.8  | 16.3 | 14.2 | 10.5    |
| SEMA3D       | 18.8         | 22.3 | 9.0  | 9.5  | 10.0 | 8.6         | 4.9  | 7.1  | 7.1  | 3.3  | 10.1    |
| MYO5C        | 24.4         | 7.8  | 20.8 | 6.5  | 18.5 | 4.0         | 1.4  | 3.6  | 7.9  | 3.4  | 9.8     |
| MAP2K7       | 29.3         | 4.7  | 12.3 | 10.0 | 11.3 | 2.7         | 8.7  | 4.0  | 2.7  | 5.7  | 9.1     |
| SFRS6        | 13.1         | 6.3  | 11.3 | 7.5  | 12.5 | 10.6        | 5.6  | 7.5  | 6.9  | 6.3  | 8.8     |
| P2RX7        | 8.1          | 6.1  | 12.4 | 8.5  | 9.3  | 13.6        | 9.3  | 6.3  | 6.8  | 3.1  | 8.3     |
| OR51E1       | 10.2         | 7.1  | 8.0  | 7.3  | 5.9  | 4.4         | 8.1  | 5.1  | 5.8  | 8.5  | 7.0     |
| GJD4         | 4.3          | 7.5  | 5.1  | 4.3  | 7.3  | 5.9         | 5.4  | 4.9  | 12.6 | 10.4 | 6.8     |
| HUWE1        | 5.9          | 6.2  | 1.9  | 4.5  | 1.9  | 8.6         | 8.7  | 11.9 | 9.4  | 3.7  | 6.3     |
| RAPGEF4      | 8.7          | 5.8  | 7.6  | 8.1  | 7.2  | 6.2         | 5.6  | 2.6  | 4.7  | 6.2  | 6.3     |
| SLC44A4      | 4.4          | 1.7  | 7.1  | 7.6  | 6.4  | 5.9         | 3.4  | 5.4  | 9.3  | 7.1  | 5.8     |
| NUP210       | 8.8          | 2.4  | 11.0 | 8.6  | 12.9 | 4.9         | 2.7  | 2.2  | 3.1  | 1.7  | 5.8     |
| SMAD3        | 8.5          | 1.5  | 5.1  | 5.8  | 5.6  | 5.1         | 1.7  | 8.1  | 10.0 | 6.1  | 5.7     |
| ROBO1        | 3.7          | 5.1  | 3.2  | 6.4  | 3.7  | 6.8         | 4.4  | 7.8  | 8.5  | 5.1  | 5.5     |
| KIAA1409     | 8.0          | 3.4  | 6.9  | 9.3  | 5.6  | 2.3         | 2.8  | 5.1  | 7.0  | 3.4  | 5.4     |
| EYA4         | 9.0          | 8.9  | 4.8  | 6.6  | 5.3  | 1.6         | 4.6  | 6.4  | 1.8  | 3.0  | 5.2     |
| CD109        | 5.0          | 7.1  | 0.4  | 5.8  | 5.4  | 1.3         | 5.0  | 5.4  | 5.0  | 10.0 | 5.0     |
| ZNF442       | 5.6          | 10.8 | 3.3  | 4.9  | 4.2  | 3.8         | 2.8  | 4.6  | 5.6  | 0.6  | 4.6     |
| GRID1        | 7.0          | 7.8  | 5.9  | 4.4  | 7.1  | 1.9         | 2.5  | 2.4  | 2.1  | 2.9  | 4.4     |
| PKNOX1       | 9.5          | 7.3  | 5.4  | 5.9  | 2.5  | 4.1         | 1.7  | 2.4  | 3.4  | 1.0  | 4.3     |
| SYNE1        | 2.5          | 9.4  | 1.9  | 2.5  | 4.4  | 6.3         | 3.8  | 4.4  | 2.5  | 5.6  | 4.3     |
| RUNX1T1      | 4.1          | 4.9  | 6.9  | 3.9  | 3.2  | 3.9         | 3.1  | 7.1  | 1.9  | 4.1  | 4.3     |
| KIAA0182     | 3.7          | 2.0  | 1.3  | 2.0  | 2.0  | 4.0         | 5.3  | 8.7  | 5.3  | 8.0  | 4.2     |
| PTPRU        | 5.4          | 2.4  | 4.7  | 4.1  | 4.7  | 4.9         | 2.2  | 6.6  | 3.9  | 3.1  | 4.2     |
| PTPRD        | 4.4          | 7.5  | 5.6  | 8.1  | 3.1  | 3.8         | 1.3  | 1.9  | 1.9  | 4.4  | 4.2     |
| CUX1         | 2.9          | 5.4  | 2.5  | 8.8  | 6.3  | 1.7         | 2.9  | 2.5  | 4.2  | 3.8  | 4.1     |
| IRS4         | 2.0          | 4.0  | 2.0  | 4.0  | 2.3  | 7.7         | 3.0  | 6.7  | 4.3  | 4.7  | 4.1     |
| MMP2         | 3.1          | 2.3  | 7.0  | 6.5  | 3.9  | 4.1         | 3.4  | 3.8  | 3.5  | 2.8  | 4.0     |
| PIK3CA       | 5.9          | 5.6  | 4.4  | 4.1  | 3.9  | 3.6         | 3.7  | 2.2  | 3.7  | 2.0  | 3.9     |
| TAF2         | 8.1          | 3.1  | 2.5  | 5.0  | 5.6  | 1.9         | 4.4  | 1.3  | 2.5  | 4.4  | 3.9     |
| MKRN3        | 4.3          | 7.3  | 4.6  | 5.8  | 6.8  | 3.4         | 1.8  | 1.5  | 0.9  | 2.1  | 3.8     |
| MAP2         | 2.7          | 4.0  | 2.0  | 12.7 | 7.0  | 0.0         | 1.3  | 1.3  | 2.7  | 4.0  | 3.8     |
| SLC29A1      | 9.4          | 3.1  | 1.9  | 5.6  | 3.8  | 3.8         | 0.6  | 1.9  | 5.0  | 1.9  | 3.7     |
| CACNA2D3     | 2.1          | 3.3  | 3.3  | 4.2  | 8.3  | 2.1         | 2.1  | 3.3  | 3.3  | 2.1  | 3.4     |
| CLSTN2       | 5.0          | 2.5  | 5.8  | 2.9  | 5.4  | 0.0         | 1.3  | 1.7  | 5.0  | 3.3  | 3.3     |
| CPAMD8       | 0.0          | 0.0  | 1.3  | 5.4  | 4.2  | 1.3         | 4.2  | 2.9  | 7.1  | 2.9  | 2.9     |

|           |     |     |     |     |     |     |     |     |      |     |     |
|-----------|-----|-----|-----|-----|-----|-----|-----|-----|------|-----|-----|
| TGFBR2    | 0.0 | 7.5 | 5.6 | 4.4 | 3.1 | 2.5 | 1.3 | 1.3 | 1.9  | 1.3 | 2.9 |
| RET       | 4.7 | 1.2 | 3.7 | 2.0 | 3.1 | 3.6 | 2.0 | 4.1 | 1.5  | 2.0 | 2.8 |
| ARHGEF10  | 1.3 | 1.7 | 2.9 | 3.3 | 3.3 | 4.6 | 2.5 | 2.5 | 2.5  | 1.7 | 2.6 |
| TP53      | 5.0 | 2.5 | 1.9 | 2.5 | 2.5 | 4.4 | 0.6 | 3.1 | 1.3  | 1.9 | 2.6 |
| CSMD3     | 2.5 | 2.1 | 3.3 | 0.0 | 5.4 | 1.7 | 0.8 | 2.1 | 3.8  | 3.3 | 2.5 |
| ZMYM4     | 9.4 | 3.1 | 1.9 | 3.1 | 1.3 | 0.0 | 1.3 | 1.9 | 1.9  | 0.6 | 2.4 |
| EPHB6     | 3.3 | 0.8 | 3.3 | 1.3 | 7.5 | 1.3 | 0.8 | 3.3 | 0.8  | 1.7 | 2.4 |
| FBN2      | 2.5 | 3.4 | 2.0 | 2.4 | 4.9 | 1.5 | 2.0 | 2.8 | 1.4  | 1.3 | 2.4 |
| DTNB      | 0.5 | 1.1 | 1.1 | 2.0 | 2.0 | 2.4 | 5.8 | 2.5 | 2.6  | 4.1 | 2.4 |
| PCDH11X   | 3.1 | 2.4 | 3.4 | 3.1 | 6.3 | 0.8 | 0.8 | 1.4 | 1.2  | 1.2 | 2.4 |
| TGM3      | 1.8 | 2.2 | 5.0 | 2.1 | 1.8 | 2.7 | 0.6 | 3.1 | 3.1  | 1.2 | 2.3 |
| EVL       | 3.3 | 2.5 | 6.7 | 0.8 | 3.3 | 1.7 | 1.7 | 1.3 | 1.7  | 0.0 | 2.3 |
| TNN       | 5.5 | 0.9 | 2.4 | 2.7 | 2.9 | 1.8 | 0.9 | 2.3 | 0.9  | 1.7 | 2.2 |
| PTEN      | 1.3 | 2.5 | 1.3 | 1.9 | 5.0 | 1.3 | 1.9 | 1.9 | 1.3  | 3.8 | 2.2 |
| LCN9      | 0.3 | 0.3 | 0.9 | 1.1 | 1.1 | 0.9 | 0.5 | 0.0 | 10.3 | 6.6 | 2.2 |
| DPP10     | 0.0 | 1.7 | 3.8 | 0.0 | 4.6 | 1.7 | 4.6 | 2.5 | 1.7  | 1.3 | 2.2 |
| FBXW7     | 2.0 | 0.5 | 0.3 | 2.4 | 2.6 | 0.8 | 4.3 | 2.4 | 2.0  | 4.2 | 2.1 |
| SH3TC1    | 4.4 | 3.8 | 2.5 | 3.1 | 3.1 | 0.6 | 0.6 | 0.6 | 2.5  | 0.0 | 2.1 |
| FAM193B   | 2.5 | 0.9 | 3.3 | 2.3 | 2.4 | 1.6 | 2.5 | 2.5 | 2.8  | 0.5 | 2.1 |
| TCF7L2    | 4.4 | 1.9 | 1.9 | 2.5 | 0.6 | 0.6 | 3.1 | 3.8 | 0.6  | 1.3 | 2.1 |
| LRP2      | 2.3 | 1.1 | 1.3 | 1.6 | 1.9 | 2.1 | 3.8 | 4.0 | 1.6  | 0.3 | 2.0 |
| ARHGEF1   | 1.8 | 1.2 | 3.6 | 2.9 | 0.5 | 1.7 | 3.1 | 2.2 | 1.3  | 1.5 | 2.0 |
| PHIP      | 1.3 | 0.7 | 2.0 | 2.0 | 0.0 | 0.7 | 2.7 | 0.0 | 5.7  | 4.7 | 2.0 |
| KRT73     | 2.0 | 1.3 | 1.3 | 2.7 | 2.7 | 2.7 | 1.3 | 2.0 | 2.0  | 1.3 | 1.9 |
| MYO19     | 1.3 | 0.7 | 4.0 | 0.7 | 3.3 | 2.0 | 0.0 | 0.7 | 3.3  | 3.3 | 1.9 |
| KRAS      | 2.0 | 2.6 | 2.1 | 1.1 | 1.5 | 1.5 | 0.4 | 2.4 | 3.6  | 2.0 | 1.9 |
| TBX22     | 1.9 | 0.8 | 1.0 | 1.8 | 3.3 | 0.5 | 1.2 | 1.5 | 5.1  | 2.1 | 1.9 |
| GNAS      | 1.6 | 1.8 | 1.1 | 1.3 | 1.1 | 1.2 | 2.8 | 3.3 | 1.4  | 3.7 | 1.9 |
| C10orf137 | 0.0 | 2.5 | 2.1 | 1.7 | 2.5 | 2.1 | 1.3 | 3.8 | 1.7  | 1.7 | 1.9 |
| ADAMTSL3  | 0.0 | 0.4 | 3.8 | 1.3 | 3.3 | 2.1 | 2.1 | 2.5 | 2.1  | 1.7 | 1.9 |
| ERICH1    | 1.3 | 2.1 | 0.8 | 0.0 | 2.1 | 2.1 | 1.7 | 3.3 | 2.1  | 3.8 | 1.9 |
| BCL9      | 3.3 | 0.8 | 2.5 | 2.5 | 1.7 | 0.8 | 2.1 | 0.0 | 2.1  | 3.3 | 1.9 |
| IGFBP3    | 2.6 | 1.8 | 2.3 | 1.8 | 2.9 | 2.3 | 2.1 | 0.5 | 1.1  | 1.8 | 1.9 |
| MCM3AP    | 0.3 | 1.9 | 4.1 | 1.9 | 2.3 | 2.5 | 1.5 | 1.0 | 1.0  | 2.3 | 1.9 |
| TCERG1L   | 1.9 | 1.3 | 1.3 | 2.5 | 3.1 | 1.3 | 0.0 | 2.5 | 1.3  | 3.1 | 1.8 |
| NF1       | 0.7 | 2.0 | 1.3 | 0.0 | 0.0 | 0.0 | 2.0 | 1.3 | 4.0  | 6.7 | 1.8 |
| FLNC      | 2.0 | 2.9 | 1.9 | 2.8 | 2.3 | 1.4 | 1.1 | 1.0 | 1.0  | 1.6 | 1.8 |
| ATP11A    | 0.4 | 0.8 | 2.1 | 1.3 | 4.2 | 0.8 | 1.3 | 1.7 | 2.5  | 2.5 | 1.8 |
| PCDHA9    | 1.2 | 2.7 | 1.2 | 2.5 | 2.0 | 1.4 | 1.5 | 1.4 | 1.9  | 1.4 | 1.7 |
| HAPLN1    | 1.8 | 1.3 | 2.4 | 2.0 | 1.4 | 1.6 | 1.7 | 0.9 | 2.4  | 1.6 | 1.7 |
| UHRF2     | 0.0 | 0.6 | 2.5 | 3.1 | 3.8 | 0.0 | 0.6 | 1.9 | 1.3  | 3.1 | 1.7 |
| ADAMTS15  | 2.5 | 1.1 | 1.6 | 1.7 | 0.9 | 1.4 | 1.2 | 2.5 | 2.4  | 1.6 | 1.7 |
| LGR6      | 1.6 | 2.0 | 1.3 | 2.1 | 1.3 | 3.0 | 1.3 | 1.8 | 1.5  | 0.9 | 1.7 |
| SMTN      | 1.9 | 1.4 | 1.0 | 2.3 | 2.2 | 0.8 | 1.7 | 1.7 | 1.4  | 2.1 | 1.6 |
| PAK6      | 1.3 | 1.2 | 2.3 | 1.3 | 2.6 | 2.8 | 0.5 | 2.6 | 0.8  | 1.2 | 1.6 |
| COL3A1    | 1.7 | 1.8 | 2.0 | 2.1 | 2.2 | 1.2 | 0.8 | 1.6 | 1.8  | 1.1 | 1.6 |
| EPHA3     | 0.8 | 1.3 | 0.8 | 2.5 | 1.3 | 0.0 | 0.8 | 1.3 | 5.0  | 2.5 | 1.6 |
| TLR9      | 2.1 | 1.5 | 1.3 | 1.5 | 4.1 | 1.5 | 1.0 | 0.8 | 1.0  | 1.0 | 1.6 |
| KIAA0556  | 1.7 | 2.0 | 3.7 | 2.0 | 2.0 | 2.0 | 1.3 | 1.0 | 0.0  | 0.0 | 1.6 |
| MAPK8IP2  | 0.7 | 0.0 | 1.3 | 5.3 | 5.7 | 0.7 | 0.0 | 0.7 | 1.3  | 0.0 | 1.6 |
| GRM1      | 1.8 | 3.0 | 2.1 | 1.8 | 1.7 | 0.8 | 0.7 | 1.3 | 1.1  | 1.1 | 1.5 |
| ADAMTS20  | 2.4 | 1.7 | 2.2 | 1.1 | 1.4 | 1.6 | 1.3 | 0.4 | 1.8  | 1.4 | 1.5 |
| IGSF22    | 1.3 | 1.3 | 0.7 | 2.0 | 2.0 | 1.0 | 0.7 | 1.0 | 2.7  | 2.7 | 1.5 |
| ITGAE     | 2.3 | 0.0 | 0.7 | 2.0 | 1.3 | 0.0 | 2.0 | 1.3 | 3.3  | 2.0 | 1.5 |
| RASGRF2   | 1.2 | 1.5 | 1.5 | 0.7 | 1.7 | 1.2 | 1.5 | 2.2 | 1.7  | 1.7 | 1.5 |
| OBSCN     | 0.7 | 1.3 | 3.3 | 1.3 | 2.7 | 0.0 | 2.0 | 0.0 | 2.0  | 1.3 | 1.5 |
| ABCA1     | 0.0 | 0.0 | 1.9 | 2.5 | 3.1 | 0.6 | 0.0 | 3.1 | 0.6  | 2.5 | 1.4 |
| APC       | 2.5 | 0.8 | 2.5 | 0.8 | 1.7 | 0.8 | 1.7 | 0.8 | 0.0  | 2.5 | 1.4 |

|           |     |     |     |     |     |     |     |     |     |     |     |
|-----------|-----|-----|-----|-----|-----|-----|-----|-----|-----|-----|-----|
| MLL3      | 2.0 | 0.7 | 2.0 | 2.7 | 2.0 | 1.3 | 0.7 | 1.3 | 0.7 | 0.7 | 1.4 |
| PLB1      | 1.4 | 0.7 | 2.4 | 2.2 | 1.0 | 1.2 | 1.9 | 0.3 | 1.4 | 1.5 | 1.4 |
| STAB1     | 1.3 | 1.0 | 1.4 | 2.6 | 2.1 | 1.0 | 0.6 | 1.2 | 0.9 | 1.7 | 1.4 |
| ERCC6     | 0.9 | 0.8 | 1.1 | 1.2 | 1.1 | 1.3 | 1.6 | 2.6 | 1.1 | 2.1 | 1.4 |
| SLC22A15  | 0.7 | 0.8 | 2.0 | 1.4 | 1.9 | 1.0 | 1.4 | 1.9 | 0.8 | 1.5 | 1.3 |
| ARHGEF9   | 1.0 | 1.5 | 1.0 | 0.8 | 1.5 | 1.7 | 1.8 | 2.2 | 0.6 | 1.0 | 1.3 |
| MAP1B     | 1.3 | 0.0 | 0.7 | 0.7 | 1.3 | 1.3 | 2.0 | 2.0 | 1.3 | 2.0 | 1.3 |
| MYO18B    | 2.1 | 0.9 | 0.8 | 1.1 | 1.3 | 0.9 | 0.9 | 1.3 | 1.4 | 1.6 | 1.2 |
| PRKD1     | 1.3 | 0.6 | 1.3 | 2.5 | 0.6 | 1.9 | 0.0 | 1.3 | 0.6 | 1.9 | 1.2 |
| EXOC4     | 1.3 | 1.6 | 0.8 | 0.8 | 0.5 | 0.9 | 1.4 | 1.8 | 1.1 | 1.8 | 1.2 |
| C10orf115 | 0.8 | 1.7 | 2.1 | 2.5 | 1.3 | 1.7 | 0.0 | 0.0 | 0.4 | 1.3 | 1.2 |
| PRDM9     | 0.7 | 1.7 | 1.3 | 2.7 | 1.3 | 1.0 | 0.7 | 1.3 | 0.7 | 0.3 | 1.2 |
| ALK       | 0.8 | 1.3 | 2.1 | 2.1 | 1.3 | 0.8 | 0.0 | 0.0 | 1.7 | 1.7 | 1.2 |
| CD46      | 2.2 | 1.3 | 1.1 | 0.8 | 1.4 | 0.9 | 0.5 | 0.9 | 1.2 | 0.7 | 1.1 |
| SYT14L    | 1.7 | 1.0 | 1.0 | 0.5 | 1.7 | 1.3 | 0.5 | 0.9 | 1.2 | 1.3 | 1.1 |
| KIAA2022  | 1.3 | 0.7 | 2.0 | 2.0 | 0.7 | 0.0 | 1.3 | 1.3 | 0.0 | 1.3 | 1.1 |
| ATP13A5   | 0.3 | 2.4 | 0.3 | 0.8 | 2.5 | 0.7 | 0.4 | 1.2 | 0.7 | 1.4 | 1.1 |
| ATP13A1   | 0.3 | 0.8 | 1.7 | 0.4 | 1.7 | 1.2 | 1.3 | 0.8 | 1.4 | 0.9 | 1.1 |
| GUCY1A2   | 0.5 | 0.4 | 0.3 | 0.4 | 1.1 | 1.6 | 1.2 | 2.4 | 1.6 | 0.9 | 1.0 |
| UQCRC2    | 1.3 | 0.0 | 1.3 | 1.3 | 1.3 | 0.6 | 0.6 | 1.3 | 0.6 | 1.9 | 1.0 |
| ADAM29    | 0.6 | 0.6 | 0.0 | 0.6 | 1.3 | 0.0 | 1.3 | 1.9 | 0.6 | 3.1 | 1.0 |
| Control   | 1.0 | 1.0 | 1.0 | 1.0 | 1.0 | 1.0 | 1.0 | 1.0 | 1.0 | 1.0 | 1.0 |
| NOS3      | 2.0 | 0.0 | 0.0 | 0.7 | 2.0 | 0.0 | 1.3 | 1.3 | 2.0 | 0.7 | 1.0 |
| PRKDC     | 1.0 | 0.8 | 1.0 | 1.2 | 0.6 | 0.8 | 0.6 | 1.0 | 1.7 | 1.2 | 1.0 |
| AKAP6     | 0.0 | 1.7 | 1.7 | 0.0 | 1.3 | 0.4 | 0.0 | 1.3 | 0.8 | 2.5 | 1.0 |
| CD93      | 1.3 | 1.7 | 0.4 | 2.1 | 0.4 | 0.0 | 0.8 | 0.0 | 0.8 | 2.1 | 1.0 |
| FAM161A   | 0.1 | 0.8 | 1.6 | 0.7 | 1.1 | 0.9 | 1.4 | 0.5 | 1.6 | 0.7 | 0.9 |
| CD248     | 2.0 | 0.5 | 0.0 | 0.5 | 2.1 | 0.4 | 0.9 | 0.8 | 0.7 | 1.3 | 0.9 |
| PRUNE2    | 0.7 | 0.7 | 0.7 | 1.7 | 0.8 | 1.0 | 0.0 | 0.8 | 1.5 | 0.8 | 0.9 |
| TIAM1     | 1.3 | 0.6 | 1.3 | 2.5 | 1.3 | 0.6 | 0.6 | 0.0 | 0.6 | 0.0 | 0.9 |
| NTNG1     | 1.3 | 0.7 | 2.0 | 2.0 | 0.0 | 0.7 | 0.0 | 0.0 | 0.7 | 1.3 | 0.9 |
| GALNS     | 0.7 | 2.0 | 0.8 | 0.8 | 0.9 | 0.1 | 0.3 | 0.7 | 0.7 | 1.7 | 0.9 |
| CHL1      | 1.1 | 0.8 | 0.4 | 0.4 | 1.3 | 0.7 | 0.8 | 0.5 | 0.8 | 1.2 | 0.8 |
| PLCG2     | 0.5 | 0.3 | 0.3 | 0.5 | 0.5 | 1.5 | 1.2 | 1.0 | 0.8 | 1.0 | 0.8 |
| AKAP12    | 0.3 | 0.3 | 1.6 | 0.7 | 1.2 | 0.3 | 1.4 | 0.9 | 0.7 | 0.5 | 0.8 |
| CNTN4     | 0.5 | 0.8 | 0.9 | 1.4 | 0.5 | 0.3 | 1.1 | 0.5 | 0.1 | 1.4 | 0.8 |
| ZNF521    | 2.2 | 0.3 | 0.3 | 0.6 | 0.5 | 1.5 | 0.1 | 0.0 | 0.8 | 1.3 | 0.8 |
| LMO7      | 2.0 | 0.7 | 1.3 | 0.7 | 0.0 | 2.0 | 0.0 | 0.0 | 0.7 | 0.0 | 0.7 |
| C15orf2   | 0.7 | 1.1 | 0.9 | 0.9 | 1.1 | 0.3 | 0.5 | 1.3 | 0.0 | 0.5 | 0.7 |
| PTPRS     | 0.8 | 1.0 | 0.5 | 0.5 | 0.3 | 0.7 | 1.0 | 1.0 | 0.7 | 0.5 | 0.7 |
| SORL1     | 0.8 | 0.8 | 0.6 | 0.3 | 1.0 | 0.6 | 0.8 | 0.4 | 0.8 | 0.9 | 0.7 |
| ACAN      | 1.3 | 0.0 | 0.0 | 0.6 | 1.3 | 1.3 | 0.6 | 0.6 | 0.0 | 0.6 | 0.6 |
| DSCAML1   | 0.3 | 0.8 | 0.3 | 0.1 | 0.8 | 0.4 | 1.1 | 1.3 | 0.3 | 0.5 | 0.6 |
| F8        | 0.0 | 0.1 | 0.7 | 1.1 | 1.1 | 0.3 | 0.0 | 0.4 | 0.4 | 1.3 | 0.5 |
| TTLL3     | 0.8 | 1.2 | 1.8 | 0.0 | 0.4 | 0.4 | 0.1 | 0.3 | 0.0 | 0.3 | 0.5 |
| ACSL5     | 0.6 | 0.6 | 1.3 | 1.3 | 0.6 | 0.0 | 0.0 | 0.6 | 0.0 | 0.0 | 0.5 |
| SMAD4     | 0.0 | 0.0 | 0.5 | 0.4 | 0.6 | 0.8 | 1.0 | 0.5 | 0.3 | 0.5 | 0.5 |
| UBB       | 0.0 | 0.0 | 0.8 | 0.6 | 0.9 | 0.0 | 0.6 | 0.1 | 0.6 | 0.5 | 0.4 |
| ABCB11    | 0.0 | 0.0 | 0.6 | 0.0 | 0.0 | 0.0 | 0.0 | 0.0 | 1.3 | 0.0 | 0.2 |
