# Supplementary material
Source: PubMed Central journal article supplement (PMC3494398)
Supplement: cr2012140x9.pdf [file cr2012140x9.pdf]

**Supplementary information, Table S4** Quantitative PCR Primer Sequences

| <b>Gene Name</b> | <b>Direction</b> | <b>Primer Sequence (5'-3')</b> |
|------------------|------------------|--------------------------------|
| FBXL2            | Forward          | TGGAACATCTTAGCCCTGGAT          |
|                  | Reverse          | CCACCACTCGACCCTCTACAT          |
| HIST1H1B         | Forward          | CTAAGGAGCGCAATGGCCTTT          |
|                  | Reverse          | CTTCGGAGTCTTCTTCACTGC          |
| HUWE1            | Forward          | TTGGACCGCTTCGATGGAATA          |
|                  | Reverse          | TGAAGTTCAACACAGCCAAGAG         |
| RNF219           | Forward          | CAGACCGTGCAGAATGTTACA          |
|                  | Reverse          | CAGGCTGACGTACCTTCCC            |
