# Supplementary material
Source: PubMed Central journal article supplement (PMC3494398)
Supplement: cr2012140x10.pdf [file cr2012140x10.pdf]

**Supplementary information, Table S5** Cross-analysis of invasion and soft-agar suppressors

| Gene Name | Invasion* |      | Soft-agar** |      |
|-----------|-----------|------|-------------|------|
|           | TP53      | KRAS | TP53        | KRAS |
| ADAMTS18  | +         | +    | +           | +    |
| FBXL2     | +         | +    | +           | +    |
| HIST1H1B  | +         | +    | +           | +    |
| HUWE1     | +         | +    | +           | +    |
| MAP2K7    | +         | +    | +           | +    |
| PTPRD     | +         | +    | +           | +    |
| RNF219    | +         | +    | +           | +    |
| TAF2      | +         | +    | +           | +    |
| TGFBR2    | +         | +    | +           | +    |
| SMAD2     | +         | +    | +           | -    |
| ZMYM4     | +         | +    | +           | -    |
| DTNB      | +         | +    | -           | +    |
| KCNQ5     | +         | +    | -           | +    |
| NAV3      | +         | +    | -           | +    |
| SYNE1     | +         | +    | -           | +    |
| ADARB2    | +         | +    | -           | -    |
| ARHGEF10  | +         | +    | -           | -    |
| CACNA2D3  | +         | +    | -           | -    |
| CD109     | +         | +    | -           | -    |
| CLSTN2    | +         | +    | -           | -    |
| CUX1      | +         | +    | -           | -    |
| EPHB6     | +         | +    | -           | -    |
| ERGIC3    | +         | +    | -           | -    |
| EVL       | +         | +    | -           | -    |
| EYA4      | +         | +    | -           | -    |
| FN1       | +         | +    | -           | -    |
| GJD4      | +         | +    | -           | -    |
| GLI3      | +         | +    | -           | -    |
| GPR112    | +         | +    | -           | -    |
| GPR158    | +         | +    | -           | -    |
| KIAA1409  | +         | +    | -           | -    |
| LAMA1     | +         | +    | -           | -    |
| MMP2      | +         | +    | -           | -    |
| OR51E1    | +         | +    | -           | -    |
| P2RY14    | +         | +    | -           | -    |
| PTPRU     | +         | +    | -           | -    |
| RAPGEF4   | +         | +    | -           | -    |

|           |   |   |   |   |
|-----------|---|---|---|---|
| SEMA3D    | + | + | - | - |
| SHANK1    | + | + | - | - |
| SMAD3     | + | + | - | - |
| TGM3      | + | + | - | - |
| ZNF442    | + | + | - | - |
| ADAMTS15  | + | - | + | + |
| C15orf2   | + | - | + | + |
| CD248     | + | - | + | + |
| CNTN4     | + | - | + | + |
| COL3A1    | + | - | + | + |
| ERCC6     | + | - | + | + |
| FBXW7     | + | - | + | + |
| GRM1      | + | - | + | + |
| HAPLN1    | + | - | + | + |
| MAPK8IP2  | + | - | + | + |
| OBSCN     | + | - | + | + |
| PRDM9     | + | - | + | + |
| PRKDC     | + | - | + | + |
| TIAM1     | + | - | + | + |
| UHRF2     | + | - | + | + |
| GUCY1A2   | + | - | + | - |
| NOS3      | + | - | + | - |
| GALNS     | + | - | - | + |
| ABCB11    | + | - | - | - |
| ADAMTSL3  | + | - | - | - |
| AKAP6     | + | - | - | - |
| ALK       | + | - | - | - |
| BCL9      | + | - | - | - |
| C10orf115 | + | - | - | - |
| C10orf137 | + | - | - | - |
| ERICH1    | + | - | - | - |
| FAM193B   | + | - | - | - |
| SMTN      | + | - | - | - |
| STAB1     | + | - | - | - |
| SYT14L    | + | - | - | - |
| TBX22     | + | - | - | - |
| TLR9      | + | - | - | - |
| TNN       | + | - | - | - |
| IRS4      | - | + | + | + |
| KIAA0182  | - | + | + | + |
| MAP2      | - | + | + | + |

|          |   |   |   |   |
|----------|---|---|---|---|
| SFRS6    | - | + | + | + |
| SLC29A1  | - | + | + | + |
| TCF7L2   | - | + | + | + |
| TP53     | - | + | + | + |
| CPAMD8   | - | + | - | - |
| CSMD3    | - | + | - | - |
| FBN2     | - | + | - | - |
| GRID1    | - | + | - | - |
| MKRN3    | - | + | - | - |
| MYO5C    | - | + | - | - |
| NUP210   | - | + | - | - |
| P2RX7    | - | + | - | - |
| PCDH11X  | - | + | - | - |
| PIK3CA   | - | + | - | - |
| PKNOX1   | - | + | - | - |
| RET      | - | + | - | - |
| ROBO1    | - | + | - | - |
| RUNX1T1  | - | + | - | - |
| SCN3B    | - | + | - | - |
| SLC44A4  | - | + | - | - |
| ADAMTS20 | - | - | + | + |
| AKAP12   | - | - | + | + |
| ATP13A1  | - | - | + | + |
| ATP13A5  | - | - | + | + |
| CHL1     | - | - | + | + |
| F8       | - | - | + | + |
| FAM161A  | - | - | + | + |
| IGSF22   | - | - | + | + |
| ITGAE    | - | - | + | + |
| KIAA0556 | - | - | + | + |
| KIAA2022 | - | - | + | + |
| LMO7     | - | - | + | + |
| MAP1B    | - | - | + | + |
| NF1      | - | - | + | + |
| PAK6     | - | - | + | + |
| PHIP     | - | - | + | + |
| PRKD1    | - | - | + | + |
| PTEN     | - | - | + | + |
| SH3TC1   | - | - | + | + |
| TCERG1L  | - | - | + | + |
| UQCRC2   | - | - | + | + |

|          |   |   |   |   |
|----------|---|---|---|---|
| GNAS     | - | - | + | - |
| KRT73    | - | - | + | - |
| MLL3     | - | - | + | - |
| MYO19    | - | - | + | - |
| NTNG1    | - | - | + | - |
| CD46     | - | - | - | + |
| DSCAML1  | - | - | - | + |
| ABCA1    | - | - | - | - |
| ACAN     | - | - | - | - |
| ACSL5    | - | - | - | - |
| ADAM29   | - | - | - | - |
| APC      | - | - | - | - |
| ARHGEF1  | - | - | - | - |
| ARHGEF9  | - | - | - | - |
| ATP11A   | - | - | - | - |
| CD93     | - | - | - | - |
| DPP10    | - | - | - | - |
| EPHA3    | - | - | - | - |
| EXOC4    | - | - | - | - |
| FLNC     | - | - | - | - |
| IGFBP3   | - | - | - | - |
| KRAS     | - | - | - | - |
| LCN9     | - | - | - | - |
| LGR6     | - | - | - | - |
| LRP2     | - | - | - | - |
| MCM3AP   | - | - | - | - |
| MYO18B   | - | - | - | - |
| PCDHA9   | - | - | - | - |
| PLB1     | - | - | - | - |
| PLCG2    | - | - | - | - |
| PRUNE2   | - | - | - | - |
| PTPRS    | - | - | - | - |
| RASGRF2  | - | - | - | - |
| SLC22A15 | - | - | - | - |
| SMAD4    | - | - | - | - |
| SORL1    | - | - | - | - |
| TTLL3    | - | - | - | - |
| ZNF521   | - | - | - | - |

\* Results identified from the current study

\*\* Results obtained from Eskiocak et al, 2011
