# Supplementary material
Source: PubMed Central journal article supplement (PMC3494398)
Supplement: cr2012140x11.pdf [file cr2012140x11.pdf]

## **Supplementary information, Data S1** Materials and Methods

### *siRNA Transfection and Invasion Screening*

Pooled siGENOME siRNAs (Dharmacon, Lafayette, CO) were reverse transfected into  $1 \times 10^5$  1CTP and 1CTR HCECs using RNAiMAX per manufacturer's instructions. Briefly, siRNAs and RNAiMAX were diluted in OptiMEM medium and cells were resuspended and plated in 2% serum conditions. Twenty-four hours later, transfected cells were washed with PBS and replaced with serum-free medium overnight for starvation. For invasion assays, 24-well Matrigel-coated transwell filters (BD Biosciences, San Jose, CA) were thawed and rehydrated according to manufacturer's instructions. Transfected cells were collected, resuspended in 650 $\mu$ L serum-free medium, and 300 $\mu$ L were added to the top chamber in duplicates. The bottom chamber is filled with 600 $\mu$ L 2% serum medium plus growth supplements as a chemoattractant. After overnight incubation, non-invaded cells were scraped off with a cotton swab and wells were washed with PBS. Invaded cells were fixed for 5min in 10% neutral buffered formalin and stained for 10min with 10 $\mu$ g/mL Hoechst (Invitrogen, Grand Island, NY). Images were taken at 10X with five fields imaged per transwell.

### *Statistical Analysis*

Two independent investigators counted the number of cells per field per transwell. These counts were averaged to calculate the fold change relative to control siRNAs. Any siRNA pools that induced a fold change in invasion greater than 3x standard deviations were considered significant.

### *F-actin Staining*

1CTP HCECs were reverse transfected with siRNAs according to methods described above for three days before re-seeding into chamberslides. Cells were washed with PBS, fixed in 4% paraformaldehyde for 10min, and permeabilized with 0.1% Triton X-100. Fixed cells were then stained for F-actin using Alexa Fluor 488 phalloidin (Invitrogen, Grand Island, NY) according to manufacturers instructions.

### *Lentiviral shRNA Infection*

293FT cells were transfected using PolyJet DNA transfection reagent (SignaGen Laboratories, Rockville, MD) with 1 $\mu$ g of the appropriate pGIPZ library vector (and 1 $\mu$ g of helper plasmids (pMD2G and psPAX2). Viral supernatants were collected 24 and 48 hrs post-transfection and cleared through a 0.45 $\mu$ M filter. ICTP HCECs were infected for 4-6hrs with viral supernatants containing 4 $\mu$ g/mL polybrene (Sigma, St. Louis, MO) and selected with puromycin (Sigma, St. Louis, MO). Successfully infected cells were GFP positive and resistant to three-day puromycin selection.

#### *Quantitative Real-Time PCR*

Total RNA were isolated from semi-confluent HCECs using RNeasy Plus Mini Kit (Qiagen, Valencia, CA) and reverse transcribed using iScript<sup>c</sup>DNA Synthesis Kit (BioRad, Hercules, CA) according to manufacturers instructions. Primers were designed using PrimerBank (<http://pga.mgh.harvard.edu/primerbank>) and obtained from Sigma. Primer sequences are listed in **Supplementary information, Table S4**. Quantitative PCR were conducted in triplicate reactions using LightCycler 480 SYBR Green I Master mix (Roche, Basel, Switzerland) and run on a LightCycler 480 Real-Time PCR System using the following amplification settings: 45 cycles at 95°C for 10sec, 60°C for 15sec, and 72°C for 40sec. The housekeeping gene GAPDH was used as an internal control and data were normalized to a non-silencing shRNA.

#### *Proliferation Assay*

HCECs were reverse transfected with pooled siRNAs in clear-bottom 96-well plates using the previously described method. Fresh culture medium were added to each well 48hrs post-transfection and cell viability were measured 96hrs post-transfection using CellTiter-Glo Luminescent Assay (Promega, Madison, WI) according to manufacturer's instructions. Luminescent ATP levels were detected by an Envision plate reader (Perkin-Elmer, Waltham, MA) and normalized to a non-targeting siRNA.
